1 Full Title

2 *“Aligning RNA-Seq reads to a sex chromosome complement informed reference genome*

3 *increases ability to detect sex differences in gene expression”*

4

5 Short Title

6 *“Sex chromosome complement informed alignment”*

7

8 Authors

9 Kimberly C. Olney<sup>1,2¶</sup>, Sarah M. Brotman<sup>1,4¶</sup>, Valeria Valverde-Vesling<sup>1</sup>, Jocelyn Andrews<sup>1</sup>, and

10 Melissa A. Wilson<sup>1,2,3\*</sup>

11

12 Affiliations

13 1. School of Life Sciences,

14 2. Center for Evolution and Medicine,

15 3. Center for Mechanisms of Evolution, The Biodesign Institute

16 Arizona State University, Tempe AZ 85282 USA

17 4. Department of Genetics, University of North Carolina, Chapel Hill NC 27599 USA

18

19 \*Corresponding author

20 Melissa A. Wilson

21 School of Life Sciences | Arizona State University | PO Box 874501 | Tempe, AZ 85287-4501

22 [mwilsons@asu.edu](mailto:mwilsons@asu.edu)

23

- 24 Author contributions
- 25 ¶ These authors contributed equally to this work
- 26 KCO: Supervision, Formal Analysis, Investigation, Visualization, Writing - Original Draft
- 27 Preparation, Writing - Review and Editing
- 28 SMB: Formal Analysis, Investigation, Writing - Original Draft Preparation, Writing - Review
- 29 and Editing
- 30 VVV: Investigation, Writing - Review and Editing
- 31 JA: Investigation, Writing - Review and Editing
- 32 MAW: Conceptualization, Supervision, Visualization, Resources, Project Administration,
- 33 Writing - Original Draft Preparation, Writing - Review and Editing, Funding Acquisition

34 **Abstract**

35 **Background:** Human X and Y chromosomes share an evolutionary origin and, as a consequence,  
36 sequence similarity. We investigated whether sequence homology between the X and Y  
37 chromosomes affects alignment of RNA-Seq reads, and estimates of differential expression. We  
38 tested the effects of using reference genomes informed by the sex chromosome complement of the  
39 sample's genome on measurements of RNA-Seq abundance and sex-differences in expression.

40 **Results:** The default genome includes the entire human reference genome (GRCh38), including  
41 the entire sequence of the X and Y chromosomes. We created two sex chromosome complement  
42 informed reference genomes. One sex chromosome complement informed reference genome was  
43 used for samples that lacked a Y chromosome; for this reference genome version, we hard-masked  
44 the entire Y chromosome. For the other sex chromosome complement informed reference genome,  
45 to be used for samples with a Y chromosome, we hard-masked only the pseudoautosomal regions  
46 of the Y chromosome, because these regions are duplicated identically in the reference genome on  
47 the X chromosome. We analyzed transcript abundance in the brain cortex, and whole blood from  
48 three genetic female (46, XX) and three genetic male (46, XY) samples, using both HISAT and  
49 STAR read aligners. Each sample was aligned twice; once to the default reference genome and  
50 then independently aligned to a reference genome informed by the sex chromosome complement  
51 of the sample. We then quantified sex-differences in gene expression using featureCounts to get  
52 the raw count estimates followed by Limma/Voom for normalization and differential expression.

53 **Conclusions:** We show that regardless of the choice of read aligner, using an alignment protocol  
54 informed by the sex chromosome complement of the sample results in higher expression estimates  
55 on the X chromosome in both genetic male and genetic female samples and an increased number  
56 of unique genes being called as differentially expressed between the sexes.

57 **Key words:** RNA-Seq, sex chromosomes, differential expression, transcriptome, mapping,  
58 alignment

## 59 **Author summary**

60 The human X and Y chromosomes share an evolutionary origin and sequence homology, including  
61 regions of 100% identity; this sequence homology can result in reads misaligning between the sex  
62 chromosomes, X and Y. We hypothesized that misalignment of reads on the sex chromosomes  
63 would confound estimates of transcript abundance if the sex chromosome complement of the  
64 sample is not accounted for during the alignment step. For example, because of shared sequence  
65 similarity, X-linked reads could misalign to the Y chromosome. This is expected to result in  
66 reduced expression for regions between X and Y that share high levels of homology. For this  
67 reason, we tested the effect of using a default reference genome versus a reference genome  
68 informed by the sex chromosome complement of the sample on estimates of transcript abundance  
69 in human RNA-Seq samples from the brain cortex and whole blood of three genetic female (46,  
70 XX) and three genetic male (46, XY) samples. We found that using a reference genome with the  
71 sex chromosome complement of the sample resulted in higher measurements of X-linked gene  
72 transcription for both male and female samples and more differentially expressed genes on the X  
73 and Y chromosomes. We recommend future studies requiring aligning reads to a reference genome  
74 should consider the sex chromosome complement of their samples prior to running default  
75 pipelines.

76

77

78

79

80

81

## 82 **Background**

83 Sex differences in aspects of human biology, such as development, physiology, metabolism, and  
84 disease susceptibility are partially driven by sex-specific gene regulation [1–4]. There are reported  
85 sex differences in gene expression across human tissues [5–7] and while some may be attributed  
86 to hormones and environment, there are documented genome-wide sex differences in expression  
87 based solely on the sex chromosome complement [8]. However, accounting for the sex  
88 chromosome complement of the sample in quantifying gene expression has been limited due to  
89 shared sequence homology between the sex chromosomes, X and Y, that can confound gene  
90 expression estimates.

91 The X and Y chromosomes share an evolutionary origin: mammalian X and Y  
92 chromosomes originated from a pair of indistinguishable autosomes ~180-210 million years ago  
93 that acquired the sex-determining genes [9–11]. The human X and Y chromosomes formed in two  
94 different segments: a) one that is shared across all mammals called the X-conserved region (XCR)  
95 and b) the X-added region (XAR) that is shared across all eutherian animals [10]. The sex  
96 chromosomes, X and Y, previously recombined along their entire lengths, but due to  
97 recombination suppression from Y chromosome-specific inversions [9,12], now only recombine  
98 at the tips in the pseudoautosomal regions (PAR) PAR1 and PAR2 [9–11]. PAR1 is ~2.78 million  
99 bases (Mb) and PAR2 is ~0.33 Mb; these sequences are 100% identical between X and Y  
100 [10,13,14] (Figure 1A). The PAR1 is a remnant of the XAR [10] and shared among eutherians,  
101 while the PAR2 is recently added and human-specific [14]. Other regions of high sequence  
102 similarity between X and Y include the X-transposed-region (XTR) with 98.78% homology [15]  
103 (Figure 1A). The XTR formed from an X chromosome to the Y chromosome duplication event  
104 following the human-chimpanzee divergence [10,16]. Thus, the evolution of the X and Y

105 chromosomes has resulted in a pair of chromosomes that are diverged, but still share some regions  
106 of high sequence similarity.

107 To infer which genes or transcripts are expressed, RNA-Seq reads can be aligned to a  
108 reference genome. The abundance of reads mapped to a transcript is reflective of the amount of  
109 expression of that transcript. RNA-Seq methods rely on aligning reads to an available high quality  
110 reference genome sequence, but this remains a challenge due to the intrinsic complexity in the  
111 transcriptome of regions with a high level of homology [17]. By default, the GRCh38 version of  
112 the human reference genome includes both the X and Y chromosomes, which is used to align  
113 RNA-Seq reads from both male XY and female XX samples. It is known that sequence reads from  
114 DNA will misalign along the sex chromosomes affecting downstream analyses [18]. However,  
115 this has not been tested using RNA-Seq data and the effects on differential expression analysis are  
116 not known. Considering the increasing number of human RNA-Seq consortium datasets (e.g., the  
117 Genotype-Tissue Expression project (GTEx) [19], The Cancer Genome Atlas (TCGA) [20],  
118 Geuvadis project [21], and Simons Genome Diversity Project [22]), there is an urgent need to  
119 understand how aligning to a default reference genome that includes both X and Y may affect  
120 estimates of gene expression on the sex chromosomes [1,23]. We hypothesize that regions of high  
121 sequence similarity will result in misaligning of RNA-Seq reads and reduced expression estimates  
122 (Figure 1A & B).

123 Here, we tested the effect of sex chromosome complement informed read alignment to the  
124 quantified levels of gene expression and the ability to detect sex-biased gene expression. We  
125 utilized data from the GTEx project, focusing on two tissues, whole blood and brain cortex, which  
126 are known to exhibit sex differences in gene expression [24–26]. Many genes have been reported  
127 to be differentially expressed between male and female brain samples [5–7]. Differential

128 expression in blood samples between males and females has also been documented [5,6]. We used  
129 brain cortex and whole blood tissues from three genetic male (46, XY) and three genetic female  
130 (46, XX) individuals for a total of twelve samples evenly distributed among tissues and genetic  
131 sex. We aligned all samples to a default reference genome that includes both the X and Y  
132 chromosomes and to a reference genome that is informed on the sex chromosome complement of  
133 the genome: Male XY samples were aligned to a reference genome that includes both the X and  
134 Y chromosome where the Y chromosome PAR1 and PAR2 are hard-masked with Ns (Figure 1C)  
135 so that reads will align uniquely to the X PAR sequences. Conversely, female XX samples were  
136 aligned to a reference genome where the entirety of the Y chromosome is hard-masked (Figure  
137 1C). We tested two different read aligners, HISAT [27] and STAR [28], to account for variation  
138 between alignment methods and measured differential expression using Limma/Voom [29]. We  
139 found that using a sex chromosome complement informed reference genome for aligning RNA-  
140 Seq reads increased X chromosome expression estimates in both male XY and female XX samples  
141 and uniquely identified differentially expressed genes.

142



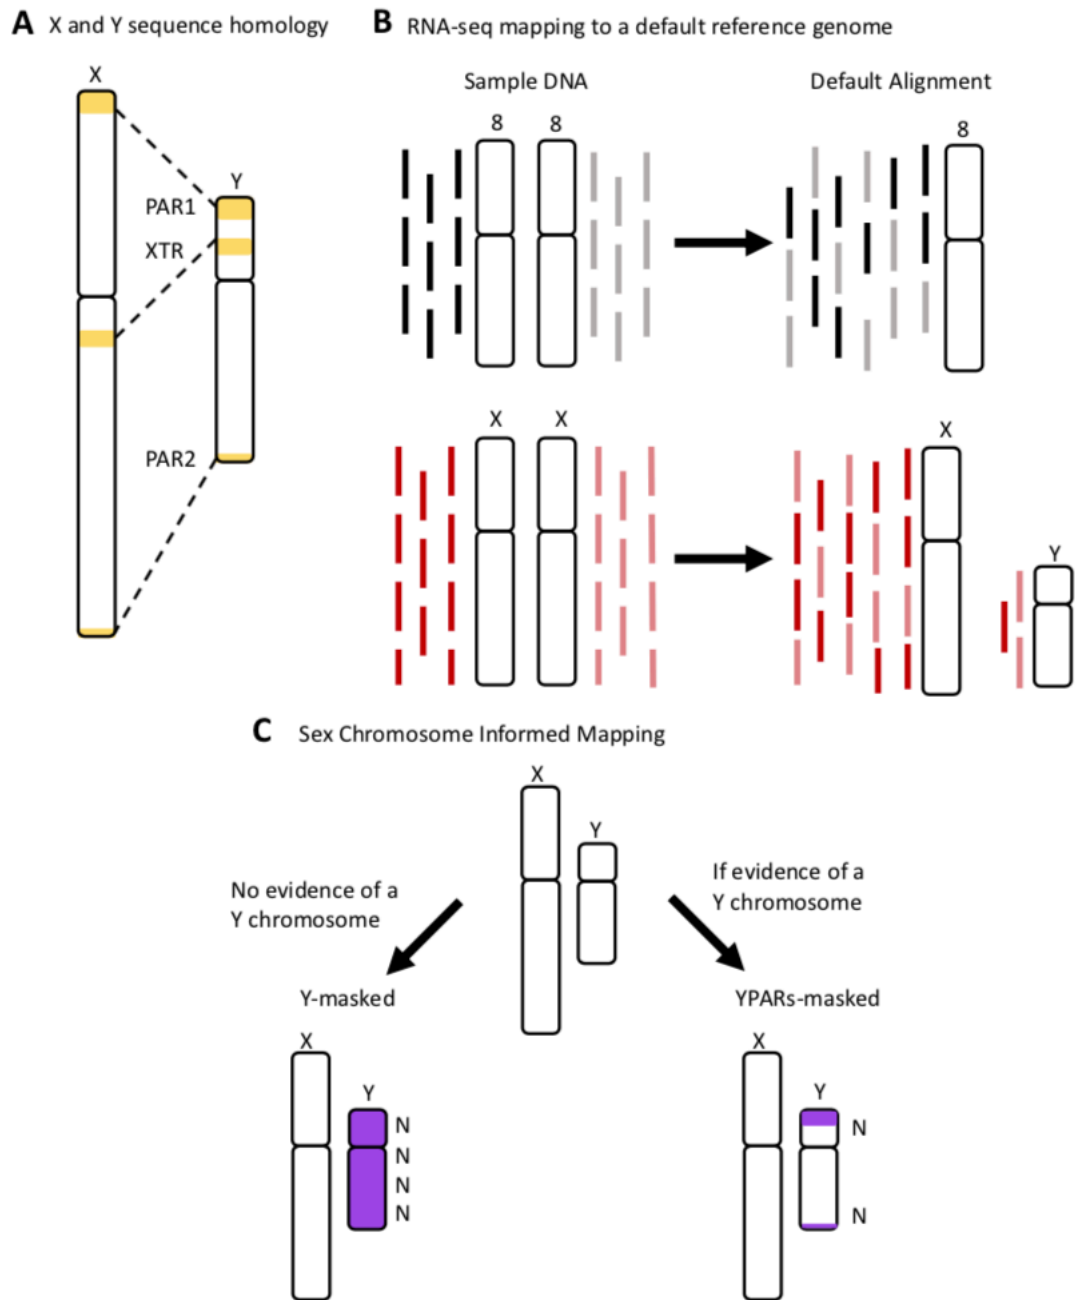

143

144 **Figure 1. Homology between the human X and Y chromosomes where misaligning could**

145 **occur.** A) High sequence homology exists between the human X and Y chromosomes in three

146 regions: 100% sequence identity for the pseudoautosomal regions (PARs), PAR1 and PAR2 and

147 ~99% sequence homology in the X-transposed region (XTR). The X chromosome PAR1 is ~2.78

148 million bases (Mb) extending from X:10,001 to 2,781,479 and the X chromosome PAR2 is ~0.33

149 Mb extending from X:155,701,383 to 156,030,895. The X chromosome PAR1 and PAR2 are  
150 identical in sequence to the Y chromosome PAR1 Y:10,001 - 2,781,479 and PAR2 Y:56,887,903  
151 - 57,217,415. **B)** Using a standard alignment approach will result in reads misaligning between  
152 regions of high sequence homology on the sex chromosomes. **C)** Using a reference genome that  
153 is informed by the genetic sex of the sample may help to reduce misaligning between the X and Y  
154 chromosomes. In humans, samples without evidence of a Y chromosome should be aligned to a  
155 Y-masked reference genome and samples with evidence of a Y should be aligned to a YPARs-  
156 masked reference genome.

157

## 158 **Methods**

### 159 *Building sex chromosome complement informed reference genomes*

160 All GRCh38.p10 unmasked genomic DNA sequences, including autosomes 1-22, X, Y,  
161 mitochondrial DNA (mtDNA), and contigs were downloaded from ensembl.org release 92 [13].  
162 The default reference genome here includes all 22 autosomes, mtDNA, the X chromosome, the Y  
163 chromosome, and contigs. For the two sex chromosome complement informed reference  
164 assemblies, we included all 22 autosomes, mtDNA, and contigs from the default reference and a)  
165 one with the Y chromosome either hard-masked for the “Y-masked reference genome” or b) one  
166 with the pseudoautosomal regions, PAR1 and PAR2, hard-masked on the Y chromosome for  
167 “YPARs-masked reference genome” (Figure 1C). Hard-masking with Ns will force reads to not  
168 align to those masked regions in the genome. Masking the entire Y chromosome for the sex  
169 chromosome complement informed reference genome, Y-masked, was accomplished by changing  
170 all the Y chromosome nucleotides [ATGC] to Ns using sed command in linux. YPARs-masked  
171 was created by hard-masking the Y PAR1: 6001-2699520 and the Y PAR2: 154931044-

172 155260560 regions. The GRCh38.p10 Y PAR1 and Y PAR2 chromosome start and end location  
173 was defined using Ensembl GRCh38 Y PAR definitions [13]. After creating the Y chromosome  
174 PAR1 and PAR2 masked fasta files, we concatenated all the Y chromosome regions together to  
175 create a YPARs-masked reference genome. After creating the GRCh38.p10 default reference  
176 genome and the two sex chromosome complement informed reference genomes, we indexed the  
177 reference genomes and created a dictionary for each using HISAT version 2.1.0 [27] `hisat2-build`  
178 `-f` option and STAR version 2.5.2 [28] using option `--genomeDir` and `--sjdbGTFfile`. Reference  
179 genome indexing was followed by picard tools version 1.119 `CreateSequenceDictionary` [30],  
180 which created a dictionary for each reference genome (Pipeline available on GitHub,  
181 [https://github.com/SexChrLab/XY\\_RNAseq](https://github.com/SexChrLab/XY_RNAseq)).

182

### 183 *RNA-Seq samples*

184 From the Genotyping-Tissue Expression (GTEx) Project data, we downloaded SRA files for brain  
185 cortex and whole blood tissues from 3 genetic female (46, XX) and 3 genetic male (46, XY)  
186 individuals [19,31] (Additional file 1). The GTEx data is described and available through dbGaP  
187 under accession phs000424.v6.p1; we received approval to access this data under dbGaP accession  
188 #8834. Although information about the genetic sex of the samples was provided in the GTEx  
189 summary downloads, it was additionally investigated by examining the gene expression of select  
190 genes that are known to be differentially expressed between the sexes or are known X-Y  
191 homologous genes: DDX3X, DDX3Y, PCDH11X, PCDH11Y, USP9X, USP9Y, USP9Y, ZFX,  
192 ZFY, UTX, UTY, XIST, and SRY (Figure 2).

193

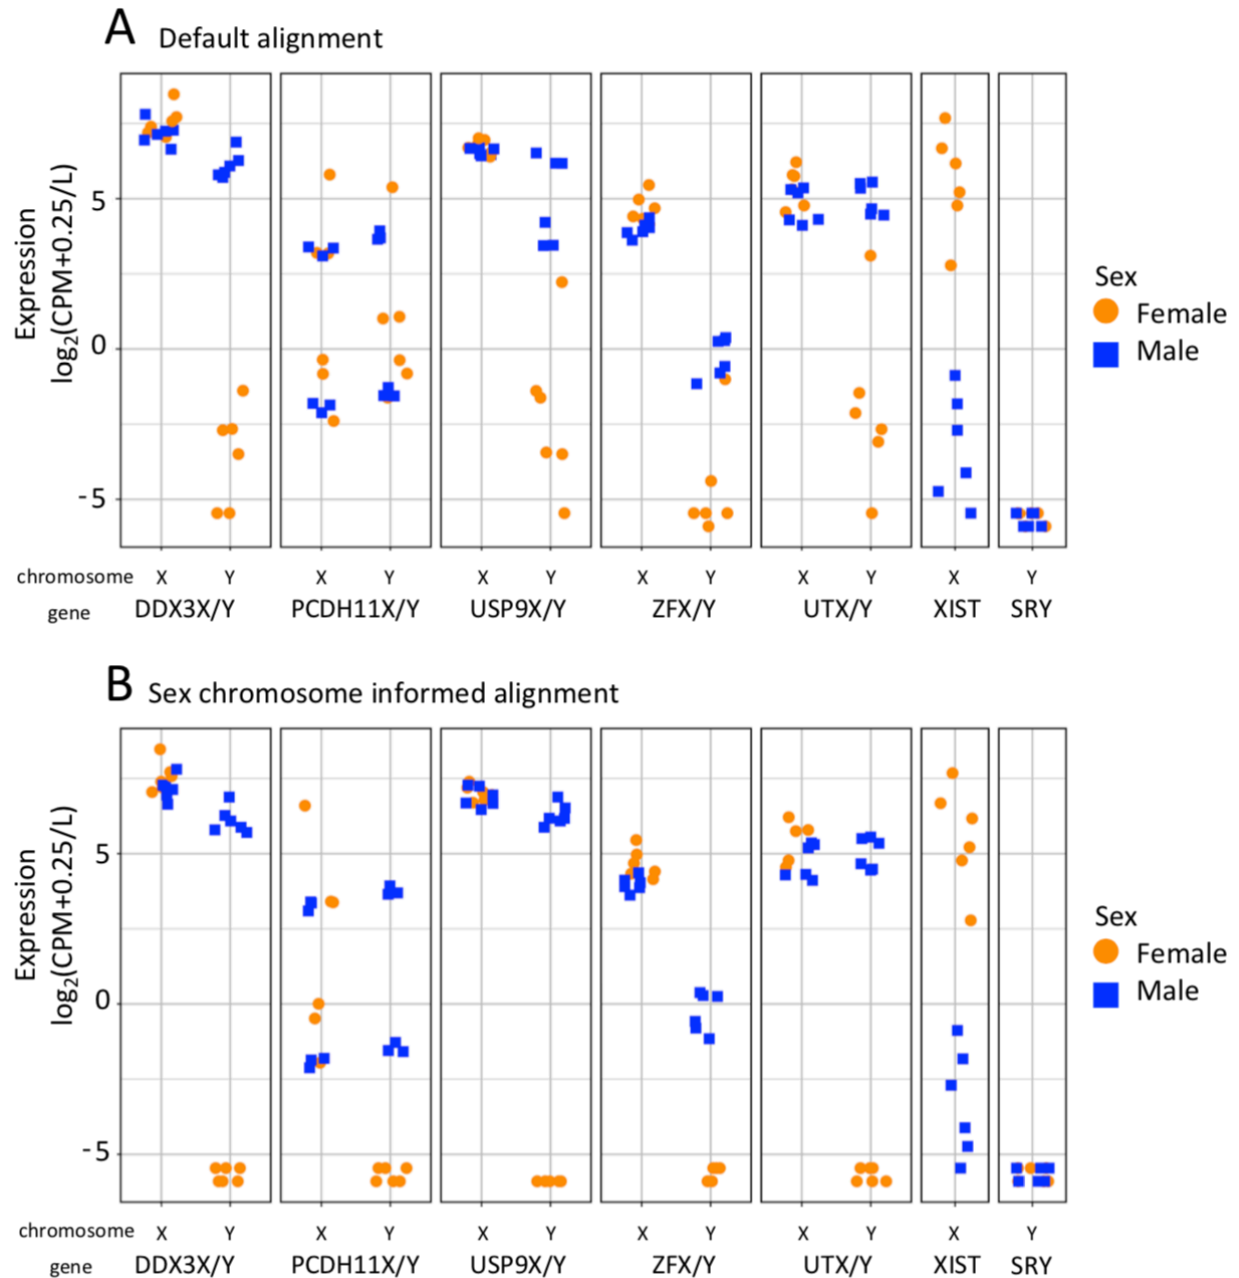

194

195 **Figure 2. Genetic sex of RNA-Seq samples.** We investigated gene expression,  
196  $\log_2(\text{CPM}+0.25/L)$ , of XY homologous genes, XIST, and SRY in all samples analyzed here from  
197 genetic males (blue squares) and genetic females (orange circles) **A**) when aligned to a default  
198 reference genome, and **B**) when aligned to a sex chromosome complement informed reference  
199 genome, using HISAT as the read aligner.

200

201 *RNA-Seq trimming and quality filtering*

202 RNA-Seq sample data was converted from sequence read archive (sra) format to the paired-end  
203 FASTQ format using the SRA toolkit [32]. Quality of the samples' raw sequencing reads was  
204 examined using FastQC [33] and MultiQC [34]. Subsequently, adapter sequences were removed  
205 using Trimmomatic version 0.36 [35]. More specifically, reads were trimmed to remove bases with  
206 a quality score less than 10 for the leading strand and less than 25 for the trailing strand, applying  
207 a sliding window of 4 with a mean PHRED quality of 30 required in the window and a minimum  
208 read length of 40 bases.

209

210 *RNA-Seq read alignment*

211 Following trimming, paired RNA-Seq reads from all samples were aligned to the default reference  
212 genome. Unpaired RNA-Seq reads were not used for alignment. Reads from the female (46, XX)  
213 samples were aligned to the Y-masked genome and reads from male (46, XY) individuals were  
214 aligned to the YPARs-masked reference genome. Read alignment was performed using HISAT  
215 version 2.1.0 [27], keeping all parameters the same, only changing the reference genome used, as  
216 described above. Read alignment was additionally performed using STAR version 2.5.2 [28],  
217 where all samples were aligned to a default reference genome and to a reference genome informed  
218 on the sex chromosome complement, keeping all parameters the same (Pipeline available on  
219 GitHub, [https://github.com/SexChrLab/XY\\_RNAseq](https://github.com/SexChrLab/XY_RNAseq)).

220

221 *Processing of RNA-Seq alignment files*

222 Aligned RNA-Seq samples from HISAT and STAR were output in Sequence Alignment Map  
223 (SAM) format and converted to Binary Alignment Map (BAM) using bamtools version 2.4.0 [36].  
224 Summaries on the BAM files, including the number of reads mapped, duplicate reads and  
225 unaligned reads were computed using bamtools version 2.4.0 package [36] (Additional file 2).  
226 RNA-Seq BAM files were indexed, sorted, duplicates were marked, and read groups added using  
227 bamtools, samtools, and Picard [36–38]. All RNA-Seq BAM files were indexed using the default  
228 reference genome using Picard ReorderSam [38], this was done so that all samples would include  
229 all chromosomes in the index files. Aligning XX samples to a Y-masked reference genome using  
230 HISAT indexes would result in no Y chromosome information in the aligned bam and bam index  
231 bai files. For downstream analysis, some tools will require that all samples have the same  
232 chromosomes, this is why we hard-mask rather than delete. Reindexing the BAM files to the  
233 default reference genome does not alter the read alignment, and thus does not alter our comparison  
234 between default and sex chromosome complement informed alignment.

235

### 236 *Gene expression level quantification*

237 Read counts for each gene across all autosomes, sex chromosomes, mtDNA, and contigs were  
238 generated using featureCounts [39] for all aligned and processed RNA-Seq BAM files. Female  
239 XX samples when aligned to a sex chromosome complement informed reference genome will  
240 show zero counts for Y-linked genes but will still include those genes in the raw counts file. This  
241 is an essential step for downstream differential expression analysis between males and females to  
242 keep the total genes the same between the sexes for comparison. Only rows that matched gene  
243 feature type in Ensembl Homo\_sapiens.GRCh38.89.gtf gene annotation [13] were included for  
244 read counting. There are 2,283 genes annotated on the X chromosome and a total of 56,571 genes

245 across the entire genome for GRCh38 version of the human reference genome [13]. Only primary  
246 alignments were counted and specified using the --primary option in featureCounts.

247

#### 248 *Differential expression*

249 Differential expression analysis was performed using the limma/voom pipeline [29,40] which has  
250 been shown to be a robust differential expression software package [41,42]. Quantified read counts  
251 from each sample generated from featureCounts were combined into a count matrix, each row  
252 representing a unique gene id and each column representing the gene counts for each unique  
253 sample. This was repeated for each tissue type, brain cortex and whole blood, and was read into R  
254 using the DGEList function in the R limma package [29,40]. A sample-level information file  
255 related to the genetic sex of the sample, male or female, and the reference genome used for  
256 alignment, default or sex chromosome complement informed, was created and corresponds to the  
257 columns of the count matrix described above.

258 Using edgeR [43], raw counts were normalized to adjust for compositional differences  
259 between the RNA-Seq libraries using the voom normalize quantile function which normalizes the  
260 reads by the method of trimmed mean of values (TMM) [29]. Counts were then transformed to  
261  $\log_2(\text{CPM}+0.25/L)$ , where CPM is counts per million, L is library size, and 0.25 is a prior count to  
262 avoid taking the log of zero [43]. For this dataset, the average library size is about 15 million,  
263 therefore L is ~15. Thus, the minimum  $\log_2(\text{CPM}+0.25/L)$  value for each sample, representing  
264 zero transcripts, is  $\log_2(0+0.25/15) = -5.90$ .

265 A minimum of 1 CPM, or the equivalent of 0 in  $\log_2(\text{CPM}+2/L)$ , in at least 3 samples per  
266 comparison was required for the gene to be kept for downstream analysis. A CPM value of 1 was  
267 used in our analysis to separate expressed genes from unexpressed genes, meaning that in a library

268 size of ~15 million reads, there are at least 15 counts in that sample. After filtering for a minimum  
269 CPM, 22,695 out of the 56,571 quantified genes were retained for the brain samples and 14,944  
270 for whole blood, as differential expression between the sexes was run separately for each tissue.  
271 A linear model was fitted to the DGEList-object, which contains the normalized gene counts for  
272 each sample, using the limma lmfit function which will fit a separate model to the expression  
273 values for each gene [29].

274 For differential expression analysis a design matrix containing the genetic sex of the sample  
275 (male or female) and which reference genome the sample was aligned to (default or sex  
276 chromosome complement informed) was created for each tissue type brain cortex and whole blood  
277 for contrasts of pairwise comparisons between the sexes and between reference genomes used for  
278 alignment. Pairwise contrasts were generated using limma makecontrasts function [29]. We  
279 identified genes that exhibited significant expression differences defined using an adjusted p-value  
280 cutoff that is less than 0.05 (5%) to account for multiple testing in pairwise comparisons between  
281 conditions using limma/voom decideTests vebayesfit [29,40] (Pipeline available on GitHub,  
282 [https://github.com/SexChrLab/XY\\_RNAseq](https://github.com/SexChrLab/XY_RNAseq)).

283

#### 284 *GO analysis*

285 We examined differences and similarities in gene enrichment terms between the differentially  
286 expressed genes obtained from the differential expression analyses of the samples aligned to the  
287 default and sex chromosome complement informed reference genomes, to investigate if the  
288 biological interpretation would change depending on the reference genome the samples were  
289 aligned to (Additional file 5). We investigated gene ontology enrichment for lists of genes that  
290 were identified as showing overexpression in one sex versus the other sex for brain cortex and



291 whole blood samples (adjusted p-value < 0.05). We used the GOrilla webtool, which utilizes a  
292 hypergeometric distribution to identify enriched GO terms [44]. A modified Fisher exact p-value  
293 cutoff < 0.001 was used to select significantly enriched terms [44].

294

## 295 **Results**

### 296 *RNA-Seq reads aligned to autosomes do not vary much between reference genomes*

297 We compared total mapped reads when reads were aligned to a default reference genome and for  
298 when reads were aligned to a reference genome informed on the sex chromosome complement  
299 (Additional file 2). Reads mapped across the whole genome, excluding the sex chromosomes,  
300 either stayed the same or increased slightly when samples were aligned to a reference genome  
301 informed on the sex chromosome complement. This was true regardless of the read aligner used,  
302 HISAT or STAR, or of the sex of the sample, XY or XX. To test the effects of realignment on an  
303 autosome, we selected chromosome 8, because it is of similar size to chromosome X. Reads  
304 aligning to chromosome 8 didn't vary tremendously or at all between aligning to the default versus  
305 sex chromosome complement informed reference for both brain cortex and whole blood tissues  
306 (1,479,544 versus 1,479,584 average number of reads mapped in default versus sex chromosome  
307 complement informed, respectively when aligned using HISAT; Additional file 2). A female XX  
308 brain cortex sample showed the largest chromosome 8 mapped read increase (334 more reads with  
309 HISAT; 608 more reads with STAR) when aligned to a sex chromosome complement informed  
310 reference genome using either aligner (Additional file 2). The sample that showed the highest  
311 decrease in mapped reads was a male XY brain cortex sample, which showed 5 fewer reads on  
312 chromosome 8 when aligned to a reference genome informed on the sex chromosome complement  
313 using HISAT read aligner. There was no decrease in chromosome 8 mapped reads when aligned

314 to a sex chromosome complement informed reference genome using STAR read aligner for male  
315 or female whole blood samples. Overall, we observed little difference in chromosome 8 mapped  
316 reads but were interested in how reads changed on the sex chromosomes, X and Y, when aligned  
317 to a sex chromosome complement informed reference genome compared to aligning to a default  
318 reference genome.

319

320 *Reads aligned to the X chromosome increase in both XX and XY samples when using a sex*  
321 *chromosome complement informed reference genome*

322 We found that when reads were aligned to a reference genome informed by the sex chromosome  
323 complement for both male XY and female XX brain cortex and whole blood samples, reads on the  
324 X chromosome increased by ~0.13% (1,627 increase in reads out of an average 1,238,463 reads  
325 for chromosome X) when aligned using HISAT. Reads on the Y chromosome decreased 100%  
326 (46,852 reads on average) in female XX samples and by ~63.43% (52,327 reads on average) in  
327 male XY samples for brain cortex and whole blood when aligned using HISAT (Additional file  
328 2). Similar increases in X chromosome and decreases in Y chromosome reads when aligned to a  
329 sex chromosome complement informed reference was observed for when STAR was used as the  
330 read aligner for both male XY and female XX brain cortex and whole blood samples (Additional  
331 file 2). While we observed tens of thousands of reads aligning to new locations when sex  
332 chromosome complement was taken into account, we also investigated the effect on expression  
333 estimates.

334

335 *Aligning to a sex chromosome complement informed reference genome increases the X*  
336 *chromosome PAR1 and PAR2 expression*

337 We explored the effect of changes in read alignment on gene expression. There is an increase in X  
338 chromosome PAR1 and PAR2 expression when reads were aligned to a reference genome  
339 informed on the sex chromosome complement and this is true for both male XY and female XX  
340 samples from the brain cortex (Figure 3) and whole blood samples using either HISAT or STAR  
341 as the read aligner (Additional file 6). We found an average of 2.83 fold increase in expression  
342 (1.21 log<sub>2</sub> fold increase) in PAR1 expression for female XX brain cortex samples and 2.71 fold  
343 increase in expression (0.95 log<sub>2</sub> fold change increase) in PAR1 for male XY brain cortex samples  
344 using HISAT read aligner (Figure 3, Additional file 6, Additional file 7). XTR in female XX brain  
345 cortex samples showed a 1.49 fold increase in expression (0.22 log<sub>2</sub> fold increase) and no change  
346 in male XY brain cortex samples. PAR2 showed an average of 2.47 fold increase (0.81 log<sub>2</sub> fold  
347 change increase) for female XX brain cortex samples and 2.19 fold increase (0.58 log<sub>2</sub> fold change  
348 increase) in PAR2 for male XY brain cortex samples using HISAT read aligner with similar results  
349 for STAR read aligner (Figure 3, Additional file 6, Additional file 7). Complete lists of the  
350 log<sub>2</sub>(CPM+0.25/L) values for each X chromosomal gene and each gene within the whole genome  
351 for male XY and female XX brain cortex and whole blood samples for when reads were aligned  
352 using the different read aligners and reference genomes are in Additional file 3 and Additional file  
353 4.

354

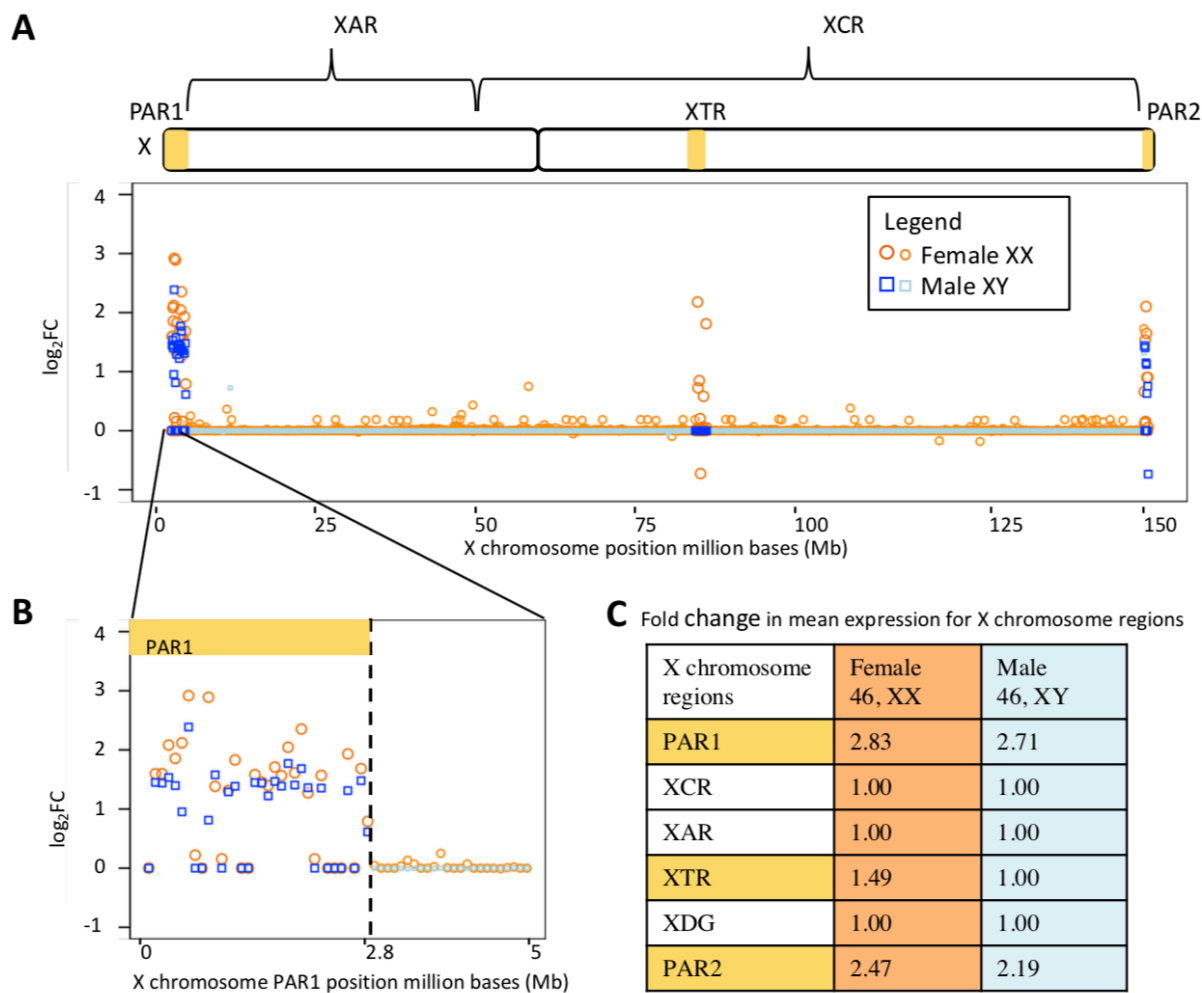

355

356 **Figure 3. X chromosome RNA-Seq alignment differences.** We plot  $\log_2$  fold change (FC) across

357 **A)** the entire X chromosome and **B)** the first 5 million bases (Mb) and show **C)** average fold change

358 in large genomic regions on the X chromosome between aligning brain cortex using HISAT to the

359 default genome and aligning to a sex-chromosome complement informed reference genome. For

360  $\log_2$  FC, a value less than zero indicates that the gene showed higher expression when aligned to

361 a default reference genome, while values above zero indicate that the gene shows higher expression

362 when aligned to a reference genome informed by the sex chromosome complement of the sample.

363 Samples from genetic females are plotted in orange circles, while samples from males are plotted

364 in blue squares. Darker shades indicate which gene points are in PAR1, XTR, and PAR2 while  
365 lighter shades are used for genes outside of those regions.

366

367 *Regions outside the PARs and XTR show little difference in expression between reference genomes*

368 Intriguingly, regions outside the PARs on the X chromosome, and across the genome, showed

369 little to no increase in expression when aligned to a sex chromosome complement informed

370 reference genome compared to aligning to a default reference genome (Additional file 7). X and

371 Y homologous genes showed little to no increase in expression when aligned to a sex chromosome

372 complement informed reference genome compared to aligning to a default reference genome with

373 the exception of PCDH11X gene (Additional file 8). PCDH11X showed a 1.50 fold increase (0.58

374  $\log_2$  fold increase) in female XX brain cortex samples with a similar increase, 1.47 fold, (0.55  $\log_2$

375 fold increase) in female XX whole blood samples using HISAT read aligner. A similar increase in

376 expression for PCDH11X was observed for female XX brain cortex and whole blood samples

377 when STAR was used as the read aligner (Additional file 8). PCDH11X showed no differences in

378 expression between reference genomes for male XY brain cortex and whole blood samples when

379 using either HISAT or STAR (Additional file 8). With noticeable increases in X chromosome gene

380 expression and decreases in Y chromosome expression when aligned to a sex chromosome

381 complement informed reference genome, we next investigated how this would affect gene

382 differential expression between the sexes.

383

384 *A sex chromosome complement informed reference genome increases the ability to detect sex*

385 *differences in gene expression*

386 Generally, when comparing gene expression differences between the sexes, we find more genes  
387 are differentially expressed on the sex chromosomes, and fewer, or the same, are differentially  
388 expressed on the autosomes when taking sex chromosome complement into account. At an  
389 adjusted p-value of 0.05 and aligning with HISAT, we find 12 new genes (all on the Y  
390 chromosome) that are only called as differentially expressed between the sexes in the brain cortex  
391 when aligned to reference genomes informed on the sex chromosome complement (Figure 4).  
392 Additionally, we find 49 genes (48 autosomal and 1 X-linked) that are called as differentially  
393 expressed when using a default reference genome for aligning reads that are no longer called as  
394 differentially expressed between the sexes in the brain cortex when aligning to a reference genome  
395 informed by sex chromosome complement (Figure 4; Additional file 9). We observed similar  
396 trends in changes for differential expression between male XY and female XX whole blood  
397 samples using either HISAT or STAR as the aligner (Additional file 9, Additional file 10).  
398

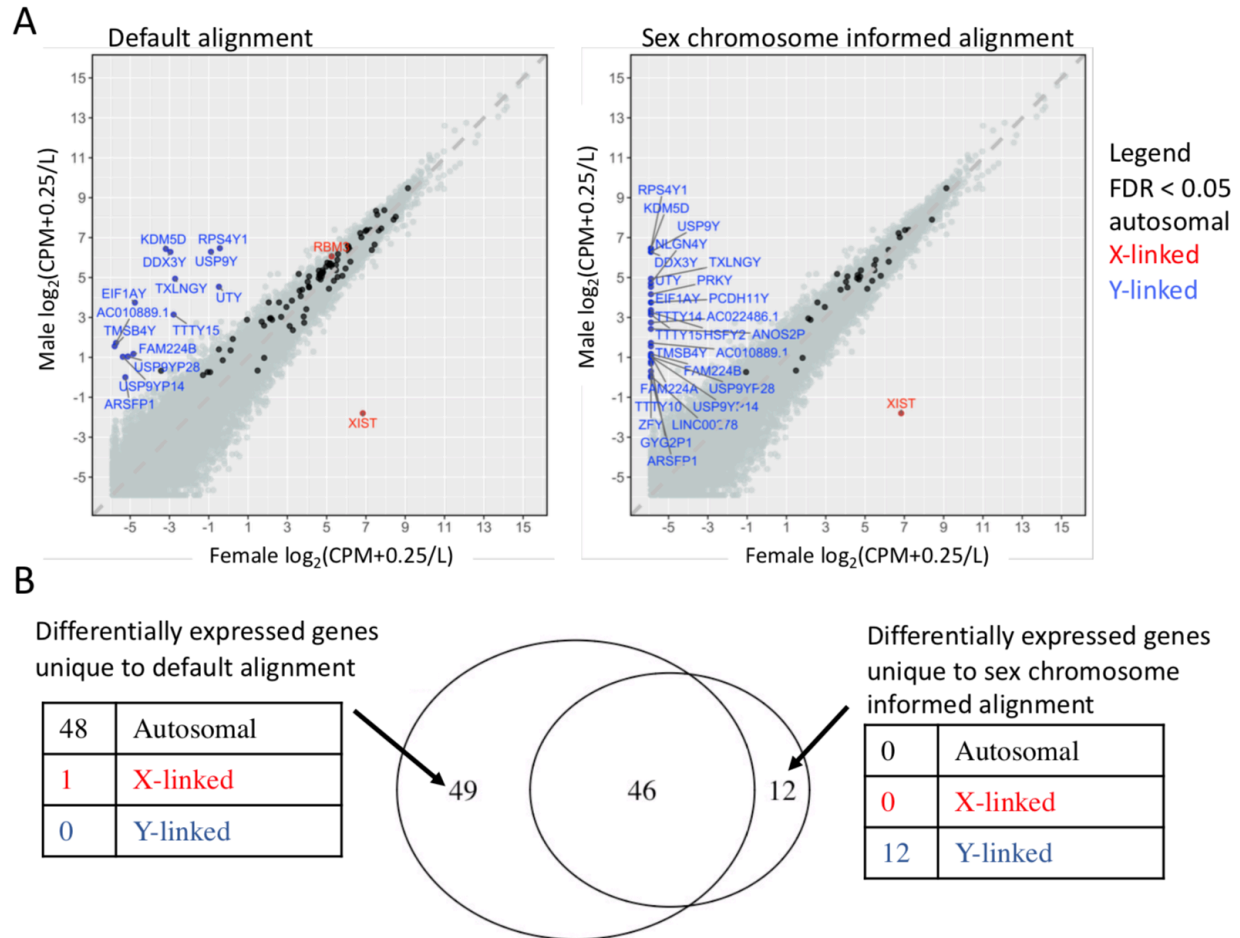

399

400 **Figure 4. Sex chromosome complement informed alignment calls more sex-linked genes as**

401 **being differentially expressed. A)** Sex differences in gene expression,  $\log_2(\text{CPM}+0.25/L)$ ,

402 between the three samples from genetic males and females are shown when aligning all samples

403 to the default reference genome (left) and a reference genome informed on the sex chromosome

404 complement (right). Each point represents a gene. Genes that are differentially expressed, adjusted

405 p-value < 0.05 are indicated in black for autosomal genes, blue for Y-linked genes, and red for X-

406 linked genes. **B)** We show overlap between genes that are called as differentially expressed when

407 all samples are aligned to the default genome, and genes that are called as differentially expressed

408 when aligned to a sex chromosome complement informed genome. When aligned to a default

409 reference genome there were 95 genes that were differentially expressed between male XY and

410 female XX brain cortex samples. Of these 95 genes, 49 genes were uniquely called as differentially  
411 expressed when aligned to the default reference genome but were not called as differentially  
412 expressed when aligned to a sex chromosome complement informed reference genome. Of the 49  
413 genes, 48 are autosomal and 1 is X-linked, RBM3. When samples were aligned to a reference  
414 genome informed on the sex chromosome complement 58 genes were called as differentially  
415 expressed between the sexes of which 12 were uniquely called in the sex chromosome complement  
416 informed alignment. All 12 uniquely called differentially expressed genes when samples were  
417 aligned to a sex chromosome complement informed reference genome are Y-linked.

418

419 *Increased concordance between aligners when informed by sex chromosome complement*

420 When using a default reference genome, and calling genes as differentially expressed between the  
421 sexes, of all genes when aligned using either HISAT or STAR as the aligner, only 46% of genes  
422 called as differentially expressed overlapped between the aligners, HISAT and STAR for brain  
423 cortex. There is 67% concordance in genes being called as differentially expressed for whole blood  
424 between aligners, HISAT and STAR, when samples were aligned to a default reference genome.  
425 In contrast, when aligning samples to a reference genome informed by the sex chromosome  
426 complement, we find increased concordance in all tissues for the set of genes called as  
427 differentially expressed between the sexes when aligned using either HISAT or STAR (Additional  
428 file 9).

429

430 *Using sex-linked genes alone is inefficient for determining the sex chromosome complement of a*  
431 *sample*



432 The sex of each sample was provided in the GTEx manifest. We investigated the expression of  
433 genes that could be used to infer the sex of the sample. We studied X and Y homologous genes,  
434 (DDX3X/Y, PCDH11X/Y, USP9X/Y, ZFX/Y, UTX/Y), and XIST and SRY gene expression in  
435 male XY and female XX brain cortex and whole blood (Figure 2). Both males XY and females  
436 XX are expected to show expression for the X-linked homologs, whereas only XY samples should  
437 show expression of the Y-linked homologs. Further, XIST expression should only be observed in  
438 XX samples and SRY should only be expressed in samples with a Y chromosome. Using the  
439 default reference genome for aligning male XY and female XX brain cortex and whole blood  
440 samples, we observed a small number of reads aligning to the Y-linked genes in female XX  
441 samples, but also observed clustering by sex for DDX3Y and XIST gene expression (Figure 2).  
442 Male XY samples showed expression for DDX3X and DDX3Y (greater than  $5 \log_2(\text{CPM}+2/L)$ ).  
443 Female XX samples showed expression for XIST (greater than  $2.5 \log_2(\text{CPM}+2/L)$ ) and male XY  
444 samples showed little to no expression for XIST (less than  $0 \log_2(\text{CPM}+2/L)$ ). In contrast to the  
445 default reference genome, when aligned to a sex chromosome complement informed reference  
446 genome, samples cluster distinctly by sex for DDX3Y, PCDH11Y, USP9Y, ZFY, UTY, and XIST  
447 all showing at least a  $2.5 \log_2(\text{CPM}+2/L)$  difference between the sexes (Figure 2).

448

## 449 **Discussion**

450 The Ensembl GRCh38 human reference genome includes all 22 autosomes, mtDNA, the X  
451 chromosome, the Y chromosome with the Y PARs masked, and contigs [13]. The Gencode hg19  
452 human reference genome includes everything with nothing masked [45]. Neither Ensembl or  
453 Gencode human reference genomes are correct for aligning both XX and XY samples. The sex

454 chromosome complement of the sample should be taken into account when aligning RNA-Seq  
455 reads to reduce misaligning sequences.

456         Measurements of X chromosome expression increase for both male XY and female XX  
457 brain cortex and whole blood samples when aligned to a sex chromosome complement informed  
458 reference genome versus aligning to a default reference genome (Figure 3). There was a minimum  
459 1.6 fold increase in expression for the genes in PAR1 and PAR2 for all samples (male and female)  
460 when aligned to a sex chromosome complement informed reference genome (Figure 3; Additional  
461 file 7). We see that the XTR has a minimum 1.35 fold increase in expression for female brain  
462 cortex and whole blood samples, when aligned to a sex chromosome complement informed  
463 reference genome compared to a default reference genome, but no change in males. This is because  
464 XTR is not hard-masked in the YPARs-masked reference genome, which is used to align male XY  
465 samples. The XTR shares 98.78% homology between X and Y but no longer recombines between  
466 X and Y [15] (Figure 1A) and is therefore, because of this divergence, not hard-masked when  
467 aligning male XY samples. A comprehensive table for mean expression values for regions of the  
468 X chromosome and X chromosome gene expression in default and sex chromosome complement  
469 informed alignment is in additional file 7 and additional file 3, respectively. Given striking  
470 increases in measurements of X chromosome expression, we further investigated the effect of sex  
471 chromosome complement informed alignment on differential gene expression between the sexes.

472         Differential expression results changed when using a sex chromosome complement  
473 informed alignment compared to using a default alignment. When aligned to a default reference  
474 genome, due to sequence similarity, some reads from female XX samples aligned to the Y  
475 chromosome (Figure 2; Figure 4). However, when aligned to a reference genome informed by the  
476 sex chromosome complement, female XX samples no longer showed Y-linked gene expression,

477 and more Y-linked genes were called as being differentially expressed between the sexes. This  
478 suggests that if using a default reference genome for aligning RNA-Seq reads, one would miss  
479 some Y-linked genes as differentially expressed between the sexes (Figure 4). Furthermore, these  
480 Y-linked genes serve in various important biological processes, thus altering the functional  
481 interpretation of the sex differences. GO enrichment analysis of genes that are more highly  
482 expressed in brain cortex male samples than females, when samples were aligned to a default  
483 reference genome, were genes involved in germline cell cycle switching and mitotic to meiotic  
484 cell cycle (Additional file 5). However, when these samples were aligned to a sex chromosome  
485 complement informed reference genome, genes upregulated in males were enriched for positive  
486 regulation of transcription from RNA polymerase II promoter in response to heat stress and GO  
487 component of specific granule lumen, which are secretory vesicles of the immune system [44].

488 The choice of read aligner has long been known to give slightly differing results of  
489 differential expression due to the differences in the alignment algorithms [42,46]. When using a  
490 default reference genome for alignment we find discordance between HISAT and STAR in which  
491 genes called as differentially expressed between the sexes. However, we find increased  
492 concordance between HISAT and STAR, when using a sex chromosome complement informed  
493 reference genome (Additional file 9). Differences between HISAT and STAR could be contributed  
494 to differences in default parameters for handling multi-aligning reads [27]. We show here that the  
495 choice of read aligner, HISAT and STAR, will have less variance on differential expression results  
496 if a sex chromosome complement informed reference genome is used for aligning RNA-Seq reads.

497 Ideally, one would use DNA to confirm presence or absence of the Y chromosome, but if  
498 DNA sequence was not generated, one would need to determine the sex of the sample by assessing  
499 expression estimates for Y-linked genes. To more carefully investigate the ability to use gene

500 expression to infer sex chromosome complement of the sample, we examined the gene expression  
501 for a select set of X-Y homologous genes, as well as XIST, and SRY that are known to be  
502 differentially expressed between the sexes (Figure 2, Additional file 11). SRY is predominantly  
503 expressed in the testis [47,48] and typically one would expect SRY to show male-specific  
504 expression. In our set, we did not observe SRY expressed in any sample, and so it could not be  
505 used to differentiate between XX and XY samples (Figure 2, Additional file 11). In contrast, the  
506 X-linked gene XIST was differentially expressed between genetic males and genetic females in  
507 both genome alignments (default and sex chromosome complement informed) for the brain cortex  
508 and whole blood samples. XIST expression is important in the X chromosome inactivation process  
509 [49] and serves to distinguish samples with one X chromosome from those with more than one X  
510 chromosome [23]. However, this does not inform about whether the sample has a Y chromosome  
511 or not. For X-Y homologous genes, we do not find sex differences in read alignment with either  
512 default or sex chromosome complement informed for the X-linked homolog. When aligned to a  
513 default reference genome, female XX samples showed some expression for homologous Y-linked  
514 genes, so only presence/absence of Y-linked reads alone is insufficient to determine sex  
515 chromosome complement of the sample (Figure 2, Additional file 11). That said, the samples  
516 broadly segregated by sex for Y-linked gene expression using default alignment. However, the  
517 pattern was messy for each individual Y-linked gene. Thus, if inferring sex from RNA-Seq data,  
518 we recommend using the estimated expression of multiple X-Y homologous genes and XIST to  
519 infer the genetic sex of the sample. Samples should be aligned to a default reference genome first  
520 to look at the expression for several Y-specific genes to determine if the sample is XY or XX.  
521 Then samples should be realigned to the appropriate sex chromosome complement informed  
522 reference genome. Independently assessing sex chromosome complement of samples becomes

523 increasingly important as karyotypically XY individuals are known to have lost the Y chromosome  
524 in particular tissues sampled, as shown in Alzheimer Disease [50], age-related macular  
525 degeneration [51], and in the blood of aging individuals [52]. Self-reported sex may not match the  
526 sex chromosome complement of the samples, even in karyotypic individuals.

527

## 528 **Conclusion**

529 Here we show that aligning RNA-Seq reads to a sex chromosome complement informed reference  
530 genome will change the results of the analysis compared to aligning reads to a default reference  
531 genome. We have previously observed that a sex chromosome complement informed alignment is  
532 important for DNA as well [53]. A sex chromosome complement informed approach is needed for  
533 a sensitive and specific analysis of gene expression on the sex chromosomes [1]. A sex  
534 chromosome complement informed reference alignment resulted in increased X chromosome  
535 expression for both male XY and female XX samples. We further found different genes called as  
536 differentially expressed between the sexes, and identified sex differences in gene pathways that  
537 were missed when samples were aligned to a default reference genome. We additionally identified  
538 that there is greater concordance between read aligners, HISAT and STAR, in the genes that are  
539 called as differentially expressed between the sexes when samples were aligned to a sex  
540 chromosome complement informed reference genome. The accurate alignment of the short RNA-  
541 Seq reads to the reference genome is essential to drawing reliable conclusions from differential  
542 expression data analysis on the sex chromosomes. We strongly urge future human RNA-Seq  
543 analysis to carefully consider the genetic sex of the sample when aligning reads, and have provided  
544 a framework for doing so ([https://github.com/SexChrLab/XY\\_RNAseq](https://github.com/SexChrLab/XY_RNAseq)).

545

546 **Acknowledgments**

547 This research was supported by startup funds from the School of Life Sciences and the Biodesign  
548 Institute at Arizona State University to MAW, School of Life Sciences Undergraduate Research  
549 (SOLUR) funding to SMB, IMSD funding to VVV, ARCS funding to KCO. This study was  
550 supported by the National Institute of General Medical Sciences of the National Institutes of Health  
551 under Award Number R35GM124827 to MAW. The content is solely the responsibility of the  
552 authors and does not necessarily represent the official views of the National Institutes of Health.  
553 We thank Heini Natri and Angela Taravella for comments on the manuscript.

554 **Additional files**

555 **Additional file 1. Sample IDs.** RNA-Seq brain cortex and whole blood tissue samples from 3  
556 genetic female (46, XX) and 3 genetic male (46, XY) individuals were downloaded from the  
557 Genotype-Tissue Expression (GTEx) project [19,31] for a total of 12 RNAseq tissue samples.

558

559 **Additional file 2. Table of mapped read statistics for default and sex chromosome**  
560 **complement informed alignment.** Total reads mapped in brain cortex and whole blood female  
561 XX and male XY samples for when reads were aligned to a default reference genome and for when  
562 reads were aligned to a reference genome informed on the sex chromosome complement. Total  
563 mapped reads for HISAT and STAR as the read aligner. The difference in reads mapped between  
564 sex chromosome complement informed and default alignment is shown to the right of the mapped  
565 reads statistics for each tissue and aligner used. Chromosome Y and chromosome X show the  
566 highest degree of difference between default and sex chromosome complement informed  
567 alignment were chromosome Y always decreased in total mapped reads and chromosome X always  
568 increased in total mapped reads when using a sex chromosome complement informed alignment.

569

570 **Additional file 3. X chromosome gene expression values per sample, aligner and reference**  
571 **genome used for alignment.** CPM values for male XY and female XX brain cortex and whole  
572 blood samples when aligned to a default and sex chromosome complement informed reference  
573 genome for chromosome X. A text format of CPM values are available on GitHub,  
574 [https://github.com/SexChrLab/XY\\_RNAseq](https://github.com/SexChrLab/XY_RNAseq).

575

576 **Additional file 4. Whole genome gene expression values per sample, aligner and reference**

577 **genome used for alignment.** CPM values for male XY and female XX brain cortex and whole  
578 blood samples when aligned to a default and sex chromosome complement informed reference  
579 genome for the whole genome (1-22, MT, X, Y and non-chromosomal). A text format of CPM  
580 values are available on GitHub, [https://github.com/SexChrLab/XY\\_RNAseq](https://github.com/SexChrLab/XY_RNAseq).

581  
582 **Additional file 5.** Gene enrichment analysis of genes that are more highly expressed in one sex  
583 verses the other sex for when samples were aligned to a default or sex chromosome complement  
584 informed reference genome using either HISAT or STAR.

585  
586 **Additional file 6. X chromosome expression differences between default and sex chromosome**  
587 **complement informed alignment.** X chromosome gene expression differences between default  
588 and sex chromosome complement informed alignment. Increase in expression when aligned to a  
589 sex chromosome complement informed reference genome is a  $\log_2$  fold change (FC) > 0. A  
590 decrease in expression when aligned to a sex chromosome complement informed reference  
591 genome is  $\log_2$  FC < 0. Female XX samples are indicated by red and pink circles for PAR1, XTR,  
592 and PAR2 genes and for all other X chromosome genes respectively. Blue and light blue squares  
593 represent male XY samples. Blue squares indicate which gene points are in PAR1, XTR, and  
594 PAR2 and light blue squares are for genes outside of those regions. Differences in X chromosome  
595 expression between reference genomes for male XY and female XX samples aligned using HISAT  
596 for the whole X chromosome and the first 5Mb are shown for the brain cortex (**A** and **B**,  
597 respectively), and the whole blood (**C** and **D**, respectively). Differences in X chromosome  
598 expression between reference genomes for male XY and female XX samples aligned using STAR  
599 for the whole X chromosome and the first 5Mb are shown for the brain cortex (**E** and **F**,



600 respectively), and the whole blood (**G** and **H**, respectively).

601

602 **Additional file 7. X chromosome regions mean and median expression values.** X chromosome  
603 regions PAR1, PAR2, XTR, XDG, XAR, XCR mean and median CPM expression for male XY  
604 and female XX brain cortex and whole blood samples when aligned to a default or sex chromosome  
605 complement informed reference genome for HISAT and STAR.

606

607 **Additional file 8. Gene expression for XY homologous genes.** X chromosome expression for 26  
608 X and Y homologous genes. Difference in gene expression for when male XY and female XX  
609 brain cortex and whole blood samples were aligned to a default and sex chromosome complement  
610 informed reference genome. Little to no difference in gene expression between default and sex  
611 chromosome complement informed reference genome alignment was observed for 25 of the 26 X  
612 and Y homologous genes for both male XY and female XX brain cortex and whole blood samples  
613 using either HISAT or STAR. PCDH11X showed a 1.50 and 1.47 fold increase in expression for  
614 brain cortex and whole blood, respectively in female XX samples using HISAT read aligner with  
615 similar results for STAR. XY male brain cortex and whole blood samples showed little to no  
616 differences in gene expression between reference genomes for the 26 X and Y homologous genes  
617 using either HISAT or STAR.

618

619 **Additional file 9. Differentially expressed genes between the sexes that were uniquely and**  
620 **jointly called between reference genomes.** Genes that are differentially expressed between the  
621 sexes, male XY and female XX, for brain cortex and whole blood samples. Differentially  
622 expressed genes that are uniquely called when using either the default or sex chromosome

623 complement informed reference genome and differentially expressed genes that jointly called  
624 between the reference genomes.

625

626 **Additional file 10. Gene expression differences between male XY and female XX samples.**

627 Sex differences in gene expression for brain cortex and whole blood samples for when samples  
628 were aligned to a default reference genome and a to a reference genome informed on the sex  
629 chromosome complement. Showing sex differences in gene expression between reference  
630 genomes used for alignment and for when samples were aligned using HISAT and STAR.

631

632 **Additional file 11. Genetic sex of RNA-Seq samples.** Gene expression  $\log_2(\text{CPM}+0.25/L)$  for

633 select XY homologous genes and XIST and SRY for when reads were aligned to a default  
634 reference genome **A)** and **C)** using HISAT and STAR, respectively and for when reads were  
635 aligned to a sex chromosome complement informed reference genome **B)** and **D)** using HISAT  
636 and STAR, respectively. Male XY brain cortex and whole blood samples are shown in blue squares  
637 and female XX brain and blood samples shown in red circles.

## 638 **References**

- 639 1. Khramtsova EA, Davis LK, Stranger BE. The role of sex in the genomics of human  
640 complex traits. *Nat Rev Genet.* 2019;20: 173–190.
- 641 2. Arnold AP, Chen X, Itoh Y. What a Difference an X or Y Makes: Sex Chromosomes, Gene  
642 Dose, and Epigenetics in Sexual Differentiation. *Handbook of Experimental Pharmacology.*  
643 2012. pp. 67–88.
- 644 3. Traglia M, Bseiso D, Gusev A, Adviento B, Park DS, Mefford JA, et al. Genetic  
645 Mechanisms Leading to Sex Differences Across Common Diseases and Anthropometric  
646 Traits. *Genetics.* 2017;205: 979–992.
- 647 4. Raznahan A, Parikshak NN, Chandran V, Blumenthal JD, Clasen LS, Alexander-Bloch AF,  
648 et al. Sex-chromosome dosage effects on gene expression in humans. *Proc Natl Acad Sci U*  
649 *S A.* 2018;115: 7398–7403.
- 650 5. Goldstein JM, Holsen L, Handa R, Tobet S. Fetal hormonal programming of sex differences  
651 in depression: linking women’s mental health with sex differences in the brain across the  
652 lifespan. *Front Neurosci.* 2014;8: 247.
- 653 6. Gershoni M, Pietrokovski S. The landscape of sex-differential transcriptome and its  
654 consequent selection in human adults. *BMC Biol.* 2017;15: 7.
- 655 7. Shi L, Zhang Z, Su B. Sex Biased Gene Expression Profiling of Human Brains at Major  
656 Developmental Stages. *Sci Rep.* 2016;6. doi:10.1038/srep21181
- 657 8. Arnold AP, Chen X. What does the “four core genotypes” mouse model tell us about sex

- 658 differences in the brain and other tissues? *Front Neuroendocrinol.* 2009;30: 1–9.
- 659 9. Lahn BT, Page DC. Four evolutionary strata on the human X chromosome. *Science.*  
660 1999;286: 964–967.
- 661 10. Ross MT, Grafham DV, Coffey AJ, Scherer S, McLay K, Muzny D, et al. The DNA  
662 sequence of the human X chromosome. *Nature.* 2005;434: 325–337.
- 663 11. Charlesworth B. The evolution of sex chromosomes. *Science.* 1991;251: 1030–1033.
- 664 12. Pandey RS, Wilson Sayres MA, Azad RK. Detecting evolutionary strata on the human x  
665 chromosome in the absence of gametologous y-linked sequences. *Genome Biol Evol.*  
666 2013;5: 1863–1871.
- 667 13. Aken BL, Achuthan P, Akanni W, Amode MR, Bernsdorff F, Bhai J, et al. Ensembl 2017.  
668 *Nucleic Acids Res.* 2017;45: D635–D642.
- 669 14. Charchar FJ, Svartman M, El-Mogharbel N, Ventura M, Kirby P, Matarazzo MR, et al.  
670 Complex events in the evolution of the human pseudoautosomal region 2 (PAR2). *Genome*  
671 *Res.* 2003;13: 281–286.
- 672 15. Veerappa AM, Padakannaya P, Ramachandra NB. Copy number variation-based  
673 polymorphism in a new pseudoautosomal region 3 (PAR3) of a human X-chromosome-  
674 transposed region (XTR) in the Y chromosome. *Funct Integr Genomics.* 2013;13: 285–293.
- 675 16. Skaletsky H, Kuroda-Kawaguchi T, Minx PJ, Cordum HS, Hillier L, Brown LG, et al. The  
676 male-specific region of the human Y chromosome is a mosaic of discrete sequence classes.  
677 *Nature.* 2003;423: 825–837.

- 678 17. Piskol R, Ramaswami G, Li JB. Reliable identification of genomic variants from RNA-seq  
679 data. *Am J Hum Genet.* 2013;93: 641–651.
- 680 18. Webster TH, Couse M, Grande BM, Karlins E, Phung TN, Richmond PA, et al. Identifying,  
681 understanding, and correcting technical biases on the sex chromosomes in next-generation  
682 sequencing data [Internet]. doi:10.1101/346940
- 683 19. GTEx Consortium. Human genomics. The Genotype-Tissue Expression (GTEx) pilot  
684 analysis: multitissue gene regulation in humans. *Science.* 2015;348: 648–660.
- 685 20. Cancer Genome Atlas Research Network, Weinstein JN, Collisson EA, Mills GB, Shaw  
686 KRM, Ozenberger BA, et al. The Cancer Genome Atlas Pan-Cancer analysis project. *Nat*  
687 *Genet.* 2013;45: 1113–1120.
- 688 21. Lappalainen T, Sammeth M, Friedländer MR, 't Hoen PAC, Monlong J, Rivas MA, et al.  
689 Transcriptome and genome sequencing uncovers functional variation in humans. *Nature.*  
690 2013;501: 506–511.
- 691 22. Mallick S, Li H, Lipson M, Mathieson I, Gymrek M, Racimo F, et al. The Simons Genome  
692 Diversity Project: 300 genomes from 142 diverse populations. *Nature.* 2016;538: 201–206.
- 693 23. Tukiainen T, Villani A-C, Yen A, Rivas MA, Marshall JL, Satija R, et al. Landscape of X  
694 chromosome inactivation across human tissues. *Nature.* 2017;550: 244–248.
- 695 24. Li R, Singh M. Sex differences in cognitive impairment and Alzheimer's disease. *Front*  
696 *Neuroendocrinol.* 2014;35: 385–403.
- 697 25. de Perrot M, Licker M, Bouchardy C, Usel M, Robert J, Spiliopoulos A. Sex differences in

- 698 presentation, management, and prognosis of patients with non-small cell lung carcinoma. *J*  
699 *Thorac Cardiovasc Surg.* 2000;119: 21–26.
- 700 26. Melé M, Ferreira PG, Reverter F, DeLuca DS, Monlong J, Sammeth M, et al. Human  
701 genomics. The human transcriptome across tissues and individuals. *Science.* 2015;348:  
702 660–665.
- 703 27. Kim D, Langmead B, Salzberg SL. HISAT: a fast spliced aligner with low memory  
704 requirements. *Nat Methods.* 2015;12: 357–360.
- 705 28. Dobin A, Davis CA, Schlesinger F, Drenkow J, Zaleski C, Jha S, et al. STAR: ultrafast  
706 universal RNA-seq aligner. *Bioinformatics.* 2013;29: 15–21.
- 707 29. Law CW, Chen Y, Shi W, Smyth GK. voom: Precision weights unlock linear model  
708 analysis tools for RNA-seq read counts. *Genome Biol.* 2014;15: R29.
- 709 30. Picard Toolkit [Internet]. Broad Institute, GitHub Repository; 2018. Available:  
710 <http://broadinstitute.github.io/picard/>
- 711 31. GTEx Consortium. The Genotype-Tissue Expression (GTEx) project. *Nat Genet.* 2013;45:  
712 580–585.
- 713 32. Sequence Read Archive. Downloading SRA data using command line utilities. National  
714 Center for Biotechnology Information (US); 2011; Available:  
715 <https://www.ncbi.nlm.nih.gov/books/NBK158899/>
- 716 33. Babraham Bioinformatics - FastQC A Quality Control tool for High Throughput Sequence  
717 Data [Internet]. [cited 11 Sep 2017]. Available:

- 718 <http://www.bioinformatics.babraham.ac.uk/projects/fastqc/>
- 719 34. Ewels P, Magnusson M, Lundin S, Källér M. MultiQC: summarize analysis results for  
720 multiple tools and samples in a single report. *Bioinformatics*. 2016;32: 3047–3048.
- 721 35. Bolger AM, Lohse M, Usadel B. Trimmomatic: a flexible trimmer for Illumina sequence  
722 data. *Bioinformatics*. 2014;30: 2114–2120.
- 723 36. Barnett DW, Garrison EK, Quinlan AR, Strömberg MP, Marth GT. BamTools: a C++ API  
724 and toolkit for analyzing and managing BAM files. *Bioinformatics*. 2011;27: 1691–1692.
- 725 37. Li H, Handsaker B, Wysoker A, Fennell T, Ruan J, Homer N, et al. The Sequence  
726 Alignment/Map format and SAMtools. *Bioinformatics*. 2009;25: 2078–2079.
- 727 38. Picard Tools - By Broad Institute [Internet]. [cited 7 May 2019]. Available:  
728 <http://broadinstitute.github.io/picard/>
- 729 39. Liao Y, Smyth GK, Shi W. featureCounts: an efficient general purpose program for  
730 assigning sequence reads to genomic features. *Bioinformatics*. 2014;30: 923–930.
- 731 40. Love MI, Huber W, Anders S. Moderated estimation of fold change and dispersion for  
732 RNA-seq data with DESeq2 [Internet]. 2014. doi:10.1101/002832
- 733 41. Seyednasrollah F, Laiho A, Elo LL. Comparison of software packages for detecting  
734 differential expression in RNA-seq studies. *Brief Bioinform*. 2015;16: 59–70.
- 735 42. Costa-Silva J, Domingues D, Lopes FM. RNA-Seq differential expression analysis: An  
736 extended review and a software tool. *PLoS One*. 2017;12: e0190152.

- 737 43. Robinson MD, McCarthy DJ, Smyth GK. edgeR: a Bioconductor package for differential  
738 expression analysis of digital gene expression data [Internet]. *Bioinformatics*. 2010. pp.  
739 139–140. doi:10.1093/bioinformatics/btp616
- 740 44. Eden E, Navon R, Steinfeld I, Lipson D, Yakhini Z. GOrilla: a tool for discovery and  
741 visualization of enriched GO terms in ranked gene lists. *BMC Bioinformatics*. 2009;10: 48.
- 742 45. Harrow J, Frankish A, Gonzalez JM, Tapanari E, Diekhans M, Kokocinski F, et al.  
743 GENCODE: the reference human genome annotation for The ENCODE Project. *Genome*  
744 *Res*. 2012;22: 1760–1774.
- 745 46. Conesa A, Madrigal P, Tarazona S, Gomez-Cabrero D, Cervera A, McPherson A, et al. A  
746 survey of best practices for RNA-seq data analysis. *Genome Biol*. 2016;17: 13.
- 747 47. Albrecht KH, Young M, Washburn LL, Eicher EM. Sry expression level and protein  
748 isoform differences play a role in abnormal testis development in C57BL/6J mice carrying  
749 certain Sry alleles. *Genetics*. 2003;164: 277–288.
- 750 48. Turner ME, Ely D, Prokop J, Milsted A. Sry, more than testis determination? [Internet].  
751 *American Journal of Physiology-Regulatory, Integrative and Comparative Physiology*.  
752 2011. pp. R561–R571. doi:10.1152/ajpregu.00645.2010
- 753 49. Carrel L, Willard HF. X-inactivation profile reveals extensive variability in X-linked gene  
754 expression in females. *Nature*. 2005;434: 400–404.
- 755 50. Dumanski JP, Lambert J-C, Rasi C, Giedraitis V, Davies H, Grenier-Boley B, et al. Mosaic  
756 Loss of Chromosome Y in Blood Is Associated with Alzheimer Disease. *Am J Hum Genet*.



757 2016;98: 1208–1219.

758 51. Grassmann F, Kiel C, den Hollander AI, Weeks DE, Lotery A, Cipriani V, et al. Y  
759 chromosome mosaicism is associated with age-related macular degeneration. *Eur J Hum*  
760 *Genet.* 2019;27: 36–41.

761 52. Forsberg LA. Loss of chromosome Y (LOY) in blood cells is associated with increased risk  
762 for disease and mortality in aging men. *Hum Genet.* 2017;136: 657–663.

763 53. Webster TH, Couse M, Grande BM, Karlins E, Phung TN, Richmond PA, et al. Identifying,  
764 understanding, and correcting technical biases on the sex chromosomes in next-generation  
765 sequencing data [Internet]. 2018. doi:10.1101/346940
