1 **Full Title**

2 *“Reference genome and transcriptome informed by the sex chromosome complement of the*  
3 *sample increases ability to detect sex differences in gene expression from RNA-Seq data”*

4

5 **Short Title**

6 *“Sex chromosome complement informed alignment”*

7

8 **Authors**

9 Kimberly C. Olney<sup>1,2</sup>, Sarah M. Brotman<sup>1,4</sup>, Jocelyn P. Andrews<sup>1,5</sup>, Valeria A. Valverde-  
10 Vesling<sup>1</sup>, and Melissa A. Wilson<sup>1,2,3\*</sup>

11

12 **Affiliations**

13 1. School of Life Sciences,

14 2. Center for Evolution and Medicine,

15 3. Center for Mechanisms of Evolution, The Biodesign Institute

16 Arizona State University, Tempe AZ 85282 USA

17 4. Department of Genetics, University of North Carolina, Chapel Hill NC 27599 USA

18 5. College of Osteopathic Medicine of the Pacific, Western University of Health Sciences,

19 Pomona CA 91766 USA

20

21 \*Corresponding author

22 Melissa A. Wilson

23 School of Life Sciences | Arizona State University | PO Box 874501 | Tempe, AZ 85287-4501

24 mwilsons@asu.edu

25 **Abstract**

26 **Background:** Human X and Y chromosomes share an evolutionary origin and, as a consequence,  
27 sequence similarity. We investigated whether sequence homology between the X and Y  
28 chromosomes affects alignment of RNA-Seq reads and estimates of differential expression. We  
29 tested the effects of using reference genomes and reference transcriptomes informed by the sex  
30 chromosome complement of the sample's genome on measurements of RNA-Seq abundance and  
31 sex differences in expression.

32 **Results:** The default genome includes the entire human reference genome (GRCh38), including  
33 the entire sequence of the X and Y chromosomes. We created two sex chromosome complement  
34 informed reference genomes. One sex chromosome complement informed reference genome was  
35 used for samples that lacked a Y chromosome; for this reference genome version, we hard-masked  
36 the entire Y chromosome. For the other sex chromosome complement informed reference genome,  
37 to be used for samples with a Y chromosome, we hard-masked only the pseudoautosomal regions  
38 of the Y chromosome, because these regions are duplicated identically in the reference genome on  
39 the X chromosome. We analyzed transcript abundance in the whole blood, brain cortex, breast,  
40 liver, and thyroid tissues from 20 genetic female (46, XX) and 20 genetic male (46, XY) samples.  
41 Each sample was aligned twice; once to the default reference genome and then independently  
42 aligned to a reference genome informed by the sex chromosome complement of the sample,  
43 repeated using two different read aligners, HISAT and STAR. We then quantified sex differences  
44 in gene expression using featureCounts to get the raw count estimates followed by Limma/Voom  
45 for normalization and differential expression. We additionally created sex chromosome  
46 complement informed transcriptome references for use in pseudo-alignment using Salmon.  
47 Transcript abundance was quantified twice for each sample; once to the default target transcripts

48 and then independently to target transcripts informed by the sex chromosome complement of the  
49 sample.

50 **Conclusions:** We show that regardless of the choice of read aligner, using an alignment protocol  
51 informed by the sex chromosome complement of the sample results in higher expression estimates  
52 on the pseudoautosomal regions of the X chromosome in both genetic male and genetic female  
53 samples, as well as an increased number of unique genes being called as differentially expressed  
54 between the sexes. We additionally show that using a pseudo-alignment approach informed on the  
55 sex chromosome complement of the sample eliminates Y-linked expression in female XX samples.

56 **Key words:** RNA-Seq, sex chromosomes, differential expression, transcriptome, mapping,  
57 alignment, pseudo-alignment, quantification.

## 58 **Author summary**

59 The human X and Y chromosomes share an evolutionary origin and sequence homology, including  
60 regions of 100% identity; this sequence homology can result in reads misaligning between the sex  
61 chromosomes, X and Y. We hypothesized that misalignment of reads on the sex chromosomes  
62 would confound estimates of transcript abundance if the sex chromosome complement of the  
63 sample is not accounted for during the alignment step. For example, because of shared sequence  
64 similarity, X-linked reads could misalign to the Y chromosome. This is expected to result in  
65 reduced expression for regions between X and Y that share high levels of homology. For this  
66 reason, we tested the effect of using a default reference genome versus a reference genome  
67 informed by the sex chromosome complement of the sample on estimates of transcript abundance  
68 in human RNA-Seq samples from whole blood, brain cortex, breast, liver, and thyroid tissues of  
69 20 genetic female (46, XX) and 20 genetic male (46, XY) samples. We found that using a reference  
70 genome with the sex chromosome complement of the sample resulted in higher measurements of  
71 X-linked gene transcription for both male and female samples and more differentially expressed  
72 genes on the X and Y chromosomes. We additionally investigated the use of a sex chromosome  
73 complement informed transcriptome reference index for alignment free quantification protocols.  
74 We observed no Y-linked expression in female XX samples only when the transcript quantification  
75 was performed using a transcriptome reference index informed on the sex chromosome  
76 complement of the sample. We recommend that future studies requiring aligning RNA-Seq reads  
77 to a reference genome or pseudo-alignment with a transcriptome reference should consider the sex  
78 chromosome complement of their samples prior to running default pipelines.

## 79 **Background**

80 Sex differences in aspects of human biology, such as development, physiology, metabolism, and  
81 disease susceptibility are partially driven by sex specific gene regulation (Arnold et al., 2012;  
82 Khramtsova et al., 2018; Raznahan et al., 2018; Traglia et al., 2017). There are reported sex  
83 differences in gene expression across human tissues (Gershoni and Pietrokovski, 2017; Goldstein  
84 et al., 2014; Shi et al., 2016) and while some may be attributed to hormones and environment,  
85 there are documented genome-wide sex differences in expression based solely on the sex  
86 chromosome complement (Arnold and Chen, 2009). However, accounting for the sex chromosome  
87 complement of the sample in quantifying gene expression has been limited due to shared sequence  
88 homology between the sex chromosomes, X and Y, that can confound gene expression estimates.

89 The X and Y chromosomes share an evolutionary origin: mammalian X and Y  
90 chromosomes originated from a pair of indistinguishable autosomes ~180-210 million years ago  
91 that acquired the sex-determining genes (Charlesworth, 1991; Lahn and Page, 1999; Ross et al.,  
92 2005). The human X and Y chromosomes formed in two different segments: a) one that is shared  
93 across all mammals called the X-conserved region (XCR) and b) the X-added region (XAR) that  
94 is shared across all eutherian animals (Ross et al., 2005). The sex chromosomes, X and Y,  
95 previously recombined along their entire lengths, but due to recombination suppression from Y  
96 chromosome-specific inversions (Lahn and Page, 1999; Pandey et al., 2013), now only recombine  
97 at the tips in the pseudoautosomal regions (PAR) PAR1 and PAR2 (Charlesworth, 1991; Lahn and  
98 Page, 1999; Ross et al., 2005). PAR1 is ~2.78 million bases (Mb) and PAR2 is ~0.33 Mb; these  
99 sequences are 100% identical between X and Y (Aken et al., 2017; Charchar et al., 2003; Ross et  
100 al., 2005) (Figure 1A). The PAR1 is a remnant of the XAR (Ross et al. 2005) and shared among  
101 eutherians, while the PAR2 is recently added and human-specific (Charchar et al., 2003). Other

102 regions of high sequence similarity between X and Y include the X-transposed-region (XTR) with  
103 98.78% homology (Veerappa et al., 2013) (Figure 1A). The XTR formed from an X chromosome  
104 to Y chromosome duplication event following the human-chimpanzee divergence (Ross et al.,  
105 2005; Skaletsky et al., 2003). Thus, the evolution of the X and Y chromosomes has resulted in a  
106 pair of chromosomes that are diverged, but still share some regions of high sequence similarity.

107 To infer which genes or transcripts are expressed, RNA-Seq reads can be aligned to a  
108 reference genome. The abundance of reads mapped to a transcript is reflective of the amount of  
109 expression of that transcript. RNA-Seq methods rely on aligning reads to an available high quality  
110 reference genome sequence, but this remains a challenge due to the intrinsic complexity in the  
111 transcriptome of regions with a high level of homology (Piskol et al., 2013). By default, the  
112 GRCh38 version of the human reference genome includes both the X and Y chromosomes, which  
113 is used to align RNA-Seq reads from both male XY and female XX samples. It is known that  
114 sequence reads from DNA will misalign along the sex chromosomes affecting downstream  
115 analyses (Webster et al., 2019). However, this has not been tested using RNA-Seq data and the  
116 effects on differential expression analysis are not known. Considering the increasing number of  
117 human RNA-Seq consortium datasets (e.g., the Genotype-Tissue Expression project (GTEx)  
118 (GTEx Consortium, 2015), The Cancer Genome Atlas (TCGA) (Cancer Genome Atlas Research  
119 Network et al., 2013), Geuvadis project (Lappalainen et al., 2013), and Simons Genome Diversity  
120 Project (Mallick et al., 2016)), there is an urgent need to understand how aligning to a default  
121 reference genome that includes both X and Y may affect estimates of gene expression on the sex  
122 chromosomes (Khramtsova et al., 2018; Tukiainen et al., 2016). We hypothesize that regions of  
123 high sequence similarity will result in misaligning of RNA-Seq reads and reduced expression  
124 estimates (Figure 1A & B).

125           Here, we tested the effect of sex chromosome complement informed read alignment on the  
126 quantified levels of gene expression and the ability to detect sex-biased gene expression. We  
127 utilized data from the GTEx project, focusing on five tissues, whole blood, brain cortex, breast,  
128 liver, and thyroid, which are known to exhibit sex differences in gene expression (Gershoni and  
129 Pietrokovski 2017; R. Li and Singh 2014; de Perrot et al. 2000; Melé et al. 2015; Mayne et al.  
130 2016). Many genes have been reported to be differentially expressed between male and female  
131 brain samples (Gershoni and Pietrokovski, 2017; Goldstein et al., 2014; Shi et al., 2016) and  
132 differential expression in blood samples between males and females has also been documented  
133 (Gershoni and Pietrokovski, 2017; Goldstein et al., 2014). An analysis of all GTEx tissue samples  
134 reported that breast mammary gland tissues are the most sex differentially expressed tissue  
135 (Gershoni and Pietrokovski, 2017). It has also been reported that there are sex disparities in thyroid  
136 cancer (Rahbari et al., 2010) and liver cancer (Natri et al., 2019; Naugler et al., 2007) suggesting  
137 possible sex differences in gene expression. We used whole blood, brain cortex, breast, liver, and  
138 thyroid tissues from 20 genetic male (46, XY) and 20 genetic female (46, XX) individuals for a  
139 total of 200 samples evenly distributed among tissues. Male and female samples, for each tissue,  
140 were age-matched between the sexes and only included samples of age 55 to 70. We aligned all  
141 samples to a default reference genome that includes both the X and Y chromosomes and to a  
142 reference genome that is informed on the sex chromosome complement of the genome: Male XY  
143 samples were aligned to a reference genome that includes both the X and Y chromosome, where  
144 the Y chromosome PAR1 and PAR2 are hard-masked with Ns (Figure 1C) so that reads will align  
145 uniquely to the X PAR sequences. Conversely, female XX samples were aligned to a reference  
146 genome where the entirety of the Y chromosome is hard-masked (Figure 1C). We tested two  
147 different read aligners, HISAT (Kim et al., 2015) and STAR (Dobin et al., 2013), to account for



148 variation between alignment methods and measured differential expression using Limma/Voom  
149 (Law et al., 2014). We found that using a sex chromosome complement informed reference  
150 genome for aligning RNA-Seq reads increased expression estimates on the pseudoautosomal  
151 regions of the X chromosome in both male XY and female XX samples and uniquely identified  
152 differentially expressed genes.

153 We additionally investigated the effect of transcriptome references on pseudo-alignment  
154 methods. We quantified abundance using Salmon (Patro et al., 2017) in male and female brain  
155 cortex samples twice, once to a default reference transcriptome index that includes both the X  
156 and Y chromosome linked transcripts and to a reference transcriptome index that is informed on  
157 the sex chromosome complement of the sample. We found that using a sex chromosome  
158 complement informed reference transcriptome index for RNA-Seq pseudo-alignment  
159 quantification eliminated Y-linked expression estimates in female XX samples, that were  
160 observed in the default approach.

161 Regardless of alignment or pseudo-alignment approach, we recommended carefully  
162 considering the annotations of the sex chromosomes in the references used, as these will affect  
163 quantifications and differential expression estimates, especially of sex chromosome linked genes.  
164

## 165 **Methods**

### 166 *Building sex chromosome complement informed reference genomes*

167 All GRCh38.p10 unmasked genomic DNA sequences, including autosomes 1-22, X, Y,  
168 mitochondrial DNA (mtDNA), and contigs were downloaded from ensembl.org release 92 (Aken  
169 et al., 2017). The default reference genome here includes all 22 autosomes, mtDNA, the X  
170 chromosome, the Y chromosome, and contigs. For the two sex chromosome complement informed

171 reference assemblies, we included all 22 autosomes, mtDNA, and contigs from the default  
172 reference and a) one with the Y chromosome either hard-masked for the “Y-masked reference  
173 genome” or b) one with the pseudoautosomal regions, PAR1 and PAR2, hard-masked on the Y  
174 chromosome for “YPARs-masked reference genome” (Figure 1C). Hard-masking with Ns will  
175 force reads to not align to those masked regions in the genome. Masking the entire Y chromosome  
176 for the sex chromosome complement informed reference genome, Y-masked, was accomplished  
177 by changing all the Y chromosome nucleotides [ATGC] to N using a sed command in linux.  
178 YPARs-masked was created by hard-masking the Y PAR1: 6001-2699520 and the Y PAR2:  
179 154931044-155260560 regions. The GRCh38.p10 Y PAR1 and Y PAR2 chromosome start and  
180 end location was defined using Ensembl GRCh38 Y PAR definitions (Aken et al., 2017). After  
181 creating the Y chromosome PAR1 and PAR2 masked fasta files, we concatenated all the Y  
182 chromosome regions together to create a YPARs-masked reference genome. After creating the  
183 GRCh38.p10 default reference genome and the two sex chromosome complement informed  
184 reference genomes, we indexed the reference genomes and created a dictionary for each using  
185 HISAT version 2.1.0 (Kim et al., 2015) `hisat2-build -f` option and STAR version 2.5.2 (Dobin et  
186 al., 2013), using option `--genomeDir` and `--sjdbGTFfile`. Reference genome indexing was followed  
187 by picard tools version 1.119 `CreateSequenceDictionary` (2020), which created a dictionary for  
188 each reference genome (Pipeline available on GitHub,  
189 [https://github.com/SexChrLab/XY\\_RNAseq](https://github.com/SexChrLab/XY_RNAseq)).

190

### 191 *Building sex chromosome complement informed transcriptome index*

192 Ensembl’s GRCh38.p10 cDNA reference transcriptome fasta consists of transcript sequences

193 resulting from Ensemble gene predictions. Ensembl’s cDNA was downloaded from [ensembl.org](http://ensembl.org)

194 release 92 (Aken et al., 2017). The default transcriptome reference includes 199,234 transcripts  
195 which includes autosomal, mtDNA, X chromosome, Y chromosome and contig transcripts. The  
196 default Ensembl cDNA does not contain Y chromosome PAR linked transcript sequences, it only  
197 contains the X chromosome PAR sequence transcripts. For the sex chromosome complement  
198 informed reference transcriptome index, we included all 22 autosomes, mtDNA, X, and contigs  
199 from the default cDNA transcriptome and we hard-masked all available Y chromosome linked  
200 transcript sequences. Hard-masking the Y chromosome linked transcripts was accomplished by  
201 changing all the Y chromosome nucleotides [ATGC] to N using a sed command in linux. After  
202 downloading the GRCh38.p10 default reference transcriptome and creating the Y-masked sex  
203 chromosome complement informed reference transcriptome fasta files, we then generated a  
204 decoy-aware transcriptome for each transcriptome reference. For generating the default decoy-  
205 aware reference transcriptome, we used the default genome as the decoy sequence. This was  
206 accomplished by concatenating the default genome fasta to the end of the default transcriptome  
207 fasta to populate the decoy file with the chromosome names, as suggested by Salmon (Patro et  
208 al., 2017). The default transcriptome fasta and the default decoy file were then used to create the  
209 mapping-based index using the Salmon version 1.2.0 index function (Patro et al., 2017). The Y-  
210 masked decoy-aware transcriptome fasta was generated by concatenating the Y-masked genome  
211 fasta to the end of the Y-masked transcriptome fasta to populate the decoy file with the  
212 chromosome names. The Y-masked transcriptome fasta and the decoy file were then used as  
213 inputs for generating the Y-masked mapping-based index using the salmon index function. For  
214 both the default and the Y-masked mapping-based index, a k-mer of 31 was used as this was  
215 suggested to work well for reads of 75bp.

216 In addition to the Ensembl reference, we investigated the effects of a sex chromosome  
217 complement reference transcriptome index using the gencode transcript reference fasta  
218 GRCh38.p12 that contains 206,694 transcripts which includes autosomal, mtDNA, X, Y and  
219 contigs. The gencode transcriptome reference includes both the X and Y PAR transcripts (J et al.,  
220 2012). Following the same parameters for the Ensembl decoy-aware transcriptome, we created  
221 two gencode sex chromosome complement decoy-aware transcriptome references, in addition to  
222 a default gencode decoy-aware transcriptome reference. The pipeline is available on GitHub,  
223 [https://github.com/SexChrLab/XY\\_RNAseq](https://github.com/SexChrLab/XY_RNAseq).

224

#### 225 *RNA-Seq samples*

226 From the Genotyping-Tissue Expression (GTEx) Project data, we downloaded SRA files for whole  
227 blood, brain cortex, breast, liver, and thyroid tissues from 20 separate genetic female (46, XX) and  
228 20 separate genetic male (46, XY) individuals (Consortium, 2015; GTEx Consortium, 2015) that  
229 were age matched between the sexes and ranged from age 55 to 70 (Additional file 1 & 2). Age  
230 matching exactly was accomplished using the `matchit` function in the R package `MatchIt` (Ho et  
231 al. 2011). The GTEx data is described and available through dbGaP under accession  
232 phs000424.v6.p1; we received approval to access this data under dbGaP accession #8834. GTEx  
233 RNA-Seq samples were sequenced to 76bp reads and the median coverage was ~82 million (M)  
234 reads (Consortium, 2015). Although information about the genetic sex of the samples was provided  
235 in the GTEx summary downloads, it was additionally investigated by examining the gene  
236 expression of select genes that are known to be differentially expressed between the sexes or are  
237 known X-Y homologous genes: *DDX3X*, *DDX3Y*, *PCDH11X*, *PCDH11Y*, *USP9X*, *USP9Y*, *ZFX*,  
238 *ZFY*, *UTX*, *UTY*, *XIST*, and *SRY* (Figure 2; Additional file 3 & 4).

239

240 *RNA-Seq trimming and quality filtering*

241 RNA-Seq sample data was converted from sequence read archive (sra) format to the paired-end  
242 FASTQ format using the SRA toolkit (Leinonen et al., 2011). Quality of the samples' raw  
243 sequencing reads was examined using FastQC (Andrews) and MultiQC . Subsequently, adapter  
244 sequences were removed using Trimmomatic version 0.36 (Bolger et al., 2014). More specifically,  
245 reads were trimmed to remove bases with a quality score less than 10 for the leading strand and  
246 less than 25 for the trailing strand, applying a sliding window of 4 with a mean PHRED quality of  
247 30 required in the window and a minimum read length of 40 bases.

248

249 *RNA-Seq read alignment*

250 Following trimming, paired RNA-Seq reads from all samples were aligned to the default reference  
251 genome. Unpaired RNA-Seq reads were not used for alignment. Reads from the female (46, XX)  
252 samples were aligned to the Y-masked reference genome and reads from male (46, XY) individuals  
253 were aligned to the YPARs-masked reference genome. Read alignment was performed using  
254 HISAT version 2.1.0 (Kim et al., 2015), keeping all parameters the same, only changing the  
255 reference genome used, as described above. Read alignment was additionally performed using  
256 STAR version 2.5.2 (Dobin et al., 2013), where all samples were aligned to a default reference  
257 genome and to a reference genome informed on the sex chromosome complement, keeping all  
258 parameters the same (Pipeline available on GitHub, [https://github.com/SexChrLab/XY\\_RNAseq](https://github.com/SexChrLab/XY_RNAseq)).

259

260 *Processing of RNA-Seq alignment files*

261 Aligned RNA-Seq samples from HISAT and STAR were output in Sequence Alignment Map  
262 (SAM) format and converted to Binary Alignment Map (BAM) format using bamtools version  
263 2.4.0 (Li et al., 2009). Summaries on the BAM files including the number of reads mapped were  
264 computed using bamtools version 2.4.0 package (Barnett et al., 2011). RNA-Seq BAM files were  
265 indexed, sorted, duplicates were marked, and read groups added using bamtools, samtools, and  
266 Picard (Barnett et al., 2011; Li et al., 2009, 2020). All RNA-Seq BAM files were indexed using  
267 the default reference genome using Picard ReorderSam (2020), this was done so that all samples  
268 would include all chromosomes in the index files. Aligning XX samples to a Y-masked reference  
269 genome using HISAT indexes would result in no Y chromosome information in the aligned BAM  
270 and BAM index bai files. For downstream analysis, some tools require that all samples have the  
271 same chromosomes, which is why we hard-masked rather than removed. Reindexing the BAM  
272 files to the default reference genome does not alter the read alignment, and thus does not alter our  
273 comparison between default and sex chromosome complement informed alignment.

274

#### 275 *Gene expression level quantification*

276 Read counts for each gene across all autosomes, sex chromosomes, mtDNA, and contigs were  
277 generated using featureCounts version 1.5.2 (Liao et al., 2014) for all aligned and processed RNA-  
278 Seq BAM files. Female XX samples when aligned to a sex chromosome complement informed  
279 reference genome will show zero counts for Y-linked genes, but will still include those genes in  
280 the raw counts file. This is an essential step for downstream differential expression analysis  
281 between males and females to keep the total genes the same between the sexes for comparison.  
282 Only rows that matched gene feature type in Ensembl Homo\_sapiens.GRCh38.89.gtf gene  
283 annotation (Aken et al., 2017) were included for read counting. There are 2,283 genes annotated

284 on the X chromosome and a total of 56,571 genes across the entire genome for GRCh38 version  
285 of the human reference genome (Aken et al., 2017). Only primary alignments were counted and  
286 specified using the --primary option in featureCounts.

287

### 288 *RNA-seq quantification for transcriptome index*

289 Transcript quantification for trimmed paired RNA-seq brain cortex samples were estimated twice,  
290 once to a default decoy-aware reference transcriptome index and once to a sex chromosome  
291 complement informed decoy-aware reference transcriptome index using Salmon with the –  
292 validateMappings flag. Salmon’s –validateMappings adopts a scheme for finding protentional  
293 mapping loci of a read using a chain algorithm introduced in minimap2 (Li, 2018). Transcript  
294 quantification for female (46, XX) samples was estimated using a Y-masked reference  
295 transcriptome index and male (46, XY) transcript quantification was estimated using a Y PAR  
296 masked reference transcriptome index when the Y PAR sequence information was available for  
297 the transcriptome build. This was repeated for both the Ensembl and the gencode cDNA  
298 transcriptome builds, keeping all parameters the same, only changing the reference transcriptome  
299 index used, as described above.

300

### 301 *DGEList object*

302 Differential expression analysis was performed using the limma/voom pipeline (Law et al., 2014)  
303 which has been shown to be a robust differential expression software package (Costa-Silva et al.,  
304 2017; Seyednasrollah et al., 2015) for both reference-based and pseudo-alignment quantification.  
305 Quantified read counts from each sample for the reference-based quantification were generated  
306 from featureCounts were combined into a count matrix, each row representing a unique gene ID

307 and each column representing the gene counts for each unique sample. This was repeated for each  
308 tissue type and read into R using the DGEList function in the R limma package (Love et al., 2014).  
309 A sample-level information file related to the genetic sex of the sample, male or female, and the  
310 reference genome used for alignment, default or sex chromosome complement informed, was  
311 created and corresponds to the columns of the count matrix described above.

312 Pseudo-aligned transcript read counts from each brain cortex sample quantified using  
313 Salmon were combined into a count matrix using tximport (Soneson et al., 2015) with each row  
314 representing a unique transcript ID and each column representing the transcript counts for each  
315 unique sample. To create length scaled transcripts per million (TPM) values to pass into limma,  
316 tximport function lengthScaledTPM was employed (Soneson et al., 2015). The reference assembly  
317 annotation file was read into R using tximport function makeTxDbFromGFF. Following this, a  
318 key of the transcript ID corresponding to the gene ID was created using the keys  
319 function (Soneson et al., 2015). Gene level TPM values were then generated using the tx2gene  
320 function. This was repeated for the Ensembl and the gencode default and sex chromosome  
321 complement informed transcriptome quantification estimates.

322

### 323 *Multidimensional Scaling*

324 Multidimensional Scaling (MDS) was performed using the DGEList-object containing gene  
325 expression count information for each sample. MDS plots were generated using the plotMDS  
326 function in in the R limma package (Law et al., 2014). The distance between each pair of samples  
327 is shown as the log<sub>2</sub> fold change between the samples. The analysis was done for each tissue  
328 separately using all shared common variable genes for dimensions (dim) 1 & 2 and dim 2 & 3.  
329 Samples that did not cluster with reported sex or clustered in unexpected ways in either dim1, 2 or



330 3 were removed from all downstream analysis (Additional file 5). MDS plots for each tissue  
331 containing the samples that were used for quality control are located in Additional file 6. Briefly,  
332 one male XY whole blood did not cluster with any of the other samples and was removed. One  
333 female XX breast sample clustered with the opposite sex and was thus removed. In brain cortex,  
334 three male XY brain cortex samples didn't cluster neatly with the other male XY samples in dim  
335 1 & 2 were thus removed. Another male brain cortex sample, although clustered with other male  
336 samples, had the lowest number of sequencing remaining after trimming for quality, 23.9M, and  
337 thus was also removed. To keep the number of samples in each sex roughly equal, four female XX  
338 brain cortex samples were randomly selected for removal. For liver and thyroid tissue, no samples  
339 appeared to cluster in any unexpected ways and thus no liver or thyroid tissue samples were  
340 removed. For all aligners the first component of variation in the MDS plot is explained by the sex  
341 of the sample (Figure 3).

342

### 343 *Differential expression*

344 Using edgeR (Robinson et al., 2010), raw counts were normalized to adjust for compositional  
345 differences between the RNA-Seq libraries using the voom normalize quantile function, which  
346 normalizes the reads by the method of trimmed mean of values (TMM) (Law et al., 2014). Counts  
347 were then transformed to  $\log_2(\text{CPM}+0.25/L)$ , where CPM is counts per million, L is library size,  
348 and 0.25 is a prior count to avoid taking the log of zero (Robinson et al., 2010). For this dataset,  
349 the average library size is about 79.76 million, therefore L is 79.76. Thus, the minimum  
350  $\log_2(\text{CPM}+0.25/L)$  value for each sample, representing zero transcripts, is  $\log_2(0+0.25/15) = -8.32$ .

351 A mean minimum of 1 CPM, or the equivalent of 0 in  $\log_2(\text{CPM}+2/L)$ , in at least one sex  
352 per tissue comparison was required for the gene to be kept for downstream analysis. A CPM value

353 of 1 was used in our analysis to separate expressed genes from unexpressed genes, meaning that  
354 in a library size of ~79.76 million reads, there are at least an average of 79 counts in at least one  
355 sex. After filtering for a minimum CPM, 53,804 out of the 56,571 quantified genes were retained  
356 for the whole blood samples, 53,822 for brain cortex, 54,184 for breast, 53,830 for liver, and  
357 53,848 for thyroid. A linear model was fitted to the DGEList-object, which contains the filtered  
358 and normalized gene counts for each sample, using the limma lmfit function which will fit a  
359 separate model to the expression values for each gene (Law et al., 2014).

360 For differential expression analysis a design matrix containing the genetic sex of the sample  
361 (male or female) and which reference genome the sample was aligned to (default or sex  
362 chromosome complement informed) was created for each tissue type for contrasts of pairwise  
363 comparisons between the sexes. Pairwise contrasts were generated using limma makecontrasts  
364 function (Law et al., 2014). We identified genes that exhibited significant expression differences  
365 defined using an Benjamini-Hochberg adjusted p-value cutoff that is less than 0.01 (1%) to account  
366 for multiple testing in pairwise comparisons between conditions using limma/voom decideTests  
367 vebayesfit (Law et al., 2014). A conservative adjusted p-value cutoff of less than 0.01 was chosen  
368 to be highly confident in the genes that were called as differentially expressed when comparing  
369 between reference genomes used for alignment. Pipeline available on GitHub,  
370 [https://github.com/SexChrLab/XY\\_RNAseq](https://github.com/SexChrLab/XY_RNAseq).

371

### 372 *GO analysis*

373 We examined differences and similarities in gene enrichment terms between the differentially  
374 expressed genes obtained from the differential expression analyses of the samples aligned to the  
375 default and sex chromosome complement informed reference genomes, to investigate if the

376 biological interpretation would change depending on the reference genome the samples were  
377 aligned to. We investigated gene ontology enrichment for lists of genes that were identified as  
378 showing overexpression in one sex versus the other sex for whole blood, brain cortex, breast, liver,  
379 and thyroid samples (adjusted p-value < 0.01). We used the GOrilla webtool, which utilizes a  
380 hypergeometric distribution to identify enriched GO terms (Eden et al., 2009). A modified Fisher  
381 exact p-value cutoff < 0.001 was used to select significantly enriched terms (Eden et al., 2009).

382

## 383 **Results**

### 384 *RNA-Seq reads aligned to autosomes do not vary much between reference genomes*

385 We compared total mapped reads when reads were aligned to a default reference genome and to a  
386 reference genome informed on the sex chromosome complement. Reads mapped across the whole  
387 genome, including the sex chromosomes, decreased when samples were aligned to a reference  
388 genome informed on the sex chromosome complement, paired t-test p-value < 0.05 (Additional  
389 files 7 - 9). This was true regardless of the read aligner used, HISAT or STAR, or of the sex of the  
390 sample, XY or XX. To test the effects of realignment on an autosome, we selected chromosome  
391 8, because of its similar size to chromosome X. Overall, there is a slight mean increase in reads  
392 mapping to chromosome 8 when samples are aligned to a sex chromosome complement informed  
393 reference genome compared to aligning to a default reference genome (Additional file 9). For  
394 female XX samples, the mean increase in reads mapping for chromosome 8 was 42.2 reads for  
395 whole blood, 50.25 for brain cortex, 109.9 for breast, 68.5 for liver, and 98.2 for thyroid  
396 (Additional file 9), which was significant using a paired t-test, p-value < 0.05 in all tissues  
397 (Additional file 9). Male XY samples also showed a mean increase in reads mapping for  
398 chromosome 8. The mean increase in reads mapping to chromosome 8 for male whole blood

399 samples was 0.84, 2.38 for brain cortex, 5.58 for breast, 3.2 for liver, and 5 for thyroid (Additional  
400 file 9). There was a significant increase, p-value < 0.05 paired t-test, for reads mapping to  
401 chromosome 8 for male brain cortex, breast, liver, and thyroid samples. There was no significant  
402 increase in reads mapping for male whole blood for chromosome 8 (Additional file 9).

403

404 *Reads aligned to the X chromosome increase in both XX and XY samples when using a sex*  
405 *chromosome complement informed reference genome*

406 We found that when reads were aligned to a reference genome informed by the sex chromosome  
407 complement for both male XY and female XX tissue samples, reads on the X chromosome  
408 increased by ~0.12% when aligned using HISAT. For all tissues and both sexes we observe an  
409 average increase of 1,991 reads on chromosome X. We observe an increase in reads mapping to  
410 the X chromosome for all tissues and for each sex, which was significant using a paired t-test, p-  
411 value < 0.05 (Additional file 9). Reads on the Y chromosome decreased 100% (67,033 reads on  
412 average) across all female XX samples and by ~57.32% (69,947 reads on average) across all male  
413 XY samples when aligned using HISAT (Additional file 7 & 9). Similar increases in X  
414 chromosome and decreases in Y chromosome reads when aligned to a sex chromosome  
415 complement informed reference were observed when STAR was used as the read aligner for both  
416 male XY and female XX samples (Additional file 8 & 9).

417

418 *Aligning to a sex chromosome complement informed reference genome increases the X*  
419 *chromosome PAR1 and PAR2 expression*

420 We next explored the effect of changes in read alignment on gene expression. There was an  
421 increase in pseudoautosomal regions, PAR1 and PAR2, expression when reads were aligned to a

422 reference genome informed on the sex chromosome complement for both male XY and female  
423 XX samples (Additional file 10 & 11). We found an average of 2.73 log<sub>2</sub> fold increase in  
424 expression in PAR1 expression for female XX brain cortex samples and 2.75 log<sub>2</sub> fold increase in  
425 expression in PAR1 for male XY brain cortex samples using HISAT (Figure 4). The X-transposed  
426 region, XTR, in female XX brain cortex samples showed a 1.22 log<sub>2</sub> fold increase in expression  
427 and no change in male XY brain cortex samples. PAR2 showed an average of 2.13 log<sub>2</sub> fold  
428 increase for female XX brain cortex samples and 2.19 log<sub>2</sub> fold increase in PAR2 for male XY  
429 brain cortex samples using HISAT, with similar results for STAR read aligner (Additional file 10  
430 & 11). Complete lists of the log<sub>2</sub>(CPM+0.25/L) values for each X chromosomal gene and each  
431 gene within the whole genome for male XY and female XX samples are in Additional file 12  
432 available on Dryad for download under <https://doi.org/10.5061/dryad.xksn02vbv>.

433  
434 *Regions outside the PARs and XTR show little difference in expression between reference genomes*  
435 Intriguingly, regions outside the PARs on the X chromosome were less affected by the choice of  
436 reference genome. Across the entire X-conserved region, we observed practically no change in  
437 estimates of gene expression between the default and sex chromosome complement informed  
438 references (e.g., a 0.99 log<sub>2</sub> fold in male thyroid samples, and 1.00 log<sub>2</sub> fold change in female  
439 brain cortex samples, essentially showing no difference (Additional file 10 & 11)). Additionally,  
440 X and Y homologous genes (*AMELX*, *ARSD*, *ARSE*, *ARSF*, *CASK*, *GYG2*, *HSFX1*, *HSFX2*,  
441 *NLGN4X*, *OFD1*, *PCDH11X*, *PRKX*, *RBMX*, *RPS4X*, *SOX3*, *STS*, *TBL1X*, *TGIF2LX*, *TMSB4X*,  
442 *TSPYL2*, *USP9X*, *VCX*, *VCX2*, *VCX3A*, *VCX3B*, *ZFX*) showed little to no increase in expression  
443 when aligned to a sex chromosome complement informed reference genome compared to aligning  
444 to a default reference genome (Additional file 13). *PCDH11X* showed the highest increase in

445 expression for all tissues regardless of read aligner. The log<sub>2</sub> fold increase in expression for  
446 *PCDH11X* for female samples when aligned using HISAT was 0.4, 0.28, 0.33, 0.16, and 0.16 for  
447 whole blood, brain cortex, breast, liver, and thyroid, respectively. Other X and Y homologous  
448 genes sometimes increased in expression depending on the tissue and sometimes there was no  
449 change in expression (Additional file 13). Next to *PCDH11X*, the most increase in expression in  
450 an X and Y homologous genes was *VCX3B*, *NLGN4X*, and *VCX3A*. *NLGN4X* in whole blood  
451 showed a 0.14 log<sub>2</sub> fold increase when aligned using HISAT. *VCX3B* showed a 0.2 log<sub>2</sub> fold  
452 increase in brain, *NLGN4X* showed a 0.04 log<sub>2</sub> fold increase in breast, *VCX3A* showed a 0.07 log<sub>2</sub>  
453 fold increase in liver, and *VCX3B* showed a 0.04 log<sub>2</sub> fold increase in thyroid, when aligned using  
454 HISAT (Additional file 13).

455

456 *A sex chromosome complement informed reference genome increases the ability to detect sex*  
457 *differences in gene expression*

458 We next investigated how this would affect gene differential expression between the sexes.  
459 Generally, we find that more genes are differentially expressed on the sex chromosomes between  
460 the sexes when the sex chromosome complements are taken into account. The number of  
461 differentially expressed genes on the autosomes remained the same or increased. At a conservative  
462 Benjamini-Hochberg adjusted p-value of < 0.01 and aligning with HISAT, we find 4 new genes  
463 (3 Y-linked and 1 X-linked) that are only called as differentially expressed between the sexes in  
464 the brain cortex when aligned to reference genomes informed on the sex chromosome complement  
465 (Figure 5; Additional file 14). We observed similar trends in changes for differential expression  
466 between male XY and female XX for whole blood, breast, liver, and thyroid samples using either  
467 HISAT or STAR as the aligner (Additional file 14). For example, in whole blood, 3 additional

468 genes are called as being differentially expressed between the sexes using HISAT, while 1  
469 additional gene is called differentially expressed when aligned using STAR. Additionally, when  
470 taking sex chromosome complement into account, the number of genes called as differentially  
471 expressed between the sexes for the breast samples increased by 13 genes (8 autosomal, 3 X-linked  
472 and 2 Y-linked) using HISAT and by 8 genes using STAR (6 autosomal and 2 X-linked)  
473 (Additional file 14 & 15). For all tissues, no genes were uniquely called as being differentially  
474 expressed between the sexes when aligned to a default reference genome compared to a reference  
475 genome informed on the sex chromosome complement (Additional file 14 & 15). Rather, only  
476 when samples were aligned to a sex chromosome complement did we observe an increase in the  
477 genes called as being differentially expressed (Figure 5; Additional file 14 & 15).

478

479 *Increase in gene enrichment pathways when samples are aligned to a sex chromosome complement*  
480 *informed reference genome*

481 A sex chromosome complement informed reference genome increases the ability to detect genes  
482 as differentially expressed between the sexes and thus alters gene enrichment results. When the  
483 thyroid samples were aligned using a sex chromosome complement informed reference genome  
484 using HISAT, genes up-regulated in male XY samples still show enrichment for positive  
485 regulation of transcription from RNA polymerase II (found when aligning to a default reference  
486 genome), but additionally find postsynaptic membrane assembly, postsynaptic membrane  
487 organization, and vocalization behavior (Additional file 16). These additional GO enrichments in  
488 the male XY thyroid samples involve *NRXN1* and *NLGN4Y* genes, both of these genes are located  
489 on the Y chromosome. GO enrichment analysis of genes that are more highly expressed in female  
490 liver compared to male liver samples, when samples were aligned to a default reference genome

491 using HISAT, were genes involved in modification histone lysine demethylation (Additional file  
492 16). However, when these samples were aligned to a sex chromosome complement informed  
493 reference genome, genes upregulated in females were enriched for histone lysine demethylation  
494 as well as negative regulation of endopeptidase activity, negative regulation of peptidase activity,  
495 cytoplasmic actin-based contraction involved in cell motility (Additional file 16). These additional  
496 GO enrichments in the female XX liver samples include the involvement of *KDM6A*, *DDX3X*, and  
497 *VILL1*. *KDM6A*, *DDX3X* are X-linked and *VILL1* is on chromosome 2. Whole blood, brain cortex,  
498 male liver, and female thyroid samples showed no difference in GO enrichment pathways when  
499 using a default reference genome compared to a sex chromosome complement reference genome  
500 for alignment when using HISAT with similar results for STAR as the read aligner (Additional  
501 file 17). Thus, while there won't always be a difference, aligning to a sex chromosome complement  
502 informed reference genome can increase ability to detect enriched pathways.

503

504 *Using sex-linked genes alone is inefficient for determining the sex chromosome complement of a*  
505 *sample*

506 The sex of each sample used in this analysis was provided in the GTEx manifest. We investigated  
507 the expression of genes that could be used to infer the sex of the sample. We studied X and Y  
508 homologous genes (*DDX3X/Y*, *PCDH11X/Y*, *USP9X/Y*, *ZFX/Y*, *UTX/Y*), *XIST*, and *SRY* gene  
509 expression in male and female whole blood, brain cortex, breast, liver, and thyroid (Figure 2;  
510 Additional file 3 & 4). Both males and females are expected to show expression for the X-linked  
511 homologs, whereas only XY samples should show expression of the Y-linked homologs. Further,  
512 *XIST* expression should only be observed in XX samples and *SRY* should only be expressed in  
513 samples with a Y chromosome. Using the default reference genome for aligning samples, we



514 observed a small number of reads aligning to the Y-linked genes in female XX samples, but also  
515 observed clustering by sex for *DDX3Y*, *USP9Y*, *ZFY*, and *UTY* gene expression (Figure 2). Male  
516 XY samples showed expression for *DDX3X*, *DDX3Y*, *USP9X*, *ZFX*, and *UTX* (greater than 5  
517  $\log_2(\text{CPM}+2/L)$ ). Female XX samples showed expression for *XIST* (greater than 4.0  
518  $\log_2(\text{CPM}+2/L)$ ) and male XY samples showed little to no expression for *XIST* (less than 0  
519  $\log_2(\text{CPM}+2/L)$ ) with the exception of 2 male whole blood samples and 1 male liver sample, which  
520 showed greater than 5  $\log_2(\text{CPM}+2/L)$  expression). In contrast to the default reference genome,  
521 when aligned to a sex chromosome complement informed reference genome, samples cluster more  
522 distinctly by sex for *DDX3Y*, *USP9Y*, *ZFY*, and *UTY*, all showing at least a 4  $\log_2(\text{CPM}+2/L)$   
523 difference between the sexes (Figure 2; Additional file 3 & 4). *SRY* is predominantly expressed in  
524 the testis (Albrecht et al., 2003; Turner et al., 2011) and typically one would expect *SRY* to show  
525 male-specific expression. In our set, we did not observe *SRY* expressed in any sample, and so it  
526 could not be used to differentiate between XX and XY samples (Figure 2, Additional file 3 & 14).  
527 In contrast, the X-linked gene *XIST* was differentially expressed between genetic males and genetic  
528 females in both genome alignments (default and sex chromosome complement informed) for the  
529 whole blood, brain cortex, breast, liver, and thyroid samples with the exception of 3 male XY  
530 samples. *XIST* expression is important in the X chromosome inactivation process (Carrel and  
531 Willard, 2005) and serves to distinguish samples with one X chromosome from those with more  
532 than one X chromosome (Tukiainen et al., 2016). However, this does not inform about whether  
533 the sample has a Y chromosome or not. For X-Y homologous genes, we do not find sex differences  
534 in read alignment with either default or sex chromosome complement informed for the X-linked  
535 homolog. When aligned to a default reference genome, female XX samples showed some

536 expression for homologous Y-linked genes, but only presence/absence of Y-linked reads alone is  
537 insufficient to determine sex chromosome complement of the sample (Figure 2, Additional file 3).

538

539 *No Y-linked transcript expression in female XX samples when quantification was estimated using*  
540 *a transcriptome index informed on the sex chromosome complement*

541 A pseudo-alignment shows similar effects of the reference to that of an alignment approach (Figure  
542 5, Additional files 18 & 19). We observed no Y-linked expression in female XX samples when  
543 transcript quantification was estimated using a Y-masked sex chromosome complement reference  
544 transcriptome index. This was true for both the Ensembl and gencode pseudo-alignment with a sex  
545 chromosome complement reference transcriptome index (Additional files 18 & 19). Interestingly,  
546 there was a large difference between the Ensembl and gencode reference files. The transcript IDs  
547 in the transcriptome cDNA fasta and the transcript IDs in the annotation file are not one-to-one for  
548 the Ensembl assembly (Zhao and Zhang, 2015). There are 190,432 transcript sequences in the  
549 Ensembl cDNA fasta file but there are 199,234 transcripts in the Ensembl annotation file. Notably,  
550 Ensembl's cDNA reference transcriptome fastas does not contain known transcripts such as the  
551 XIST transcripts (Eyras et al., 2004). The Ensembl reference transcriptome fasta also does not  
552 contain the Y PARs transcript sequences, it only contains the X PAR transcript sequences. In  
553 contrast, the gencode cDNA reference transcriptome fasta and annotation file both contain 206,694  
554 sequences, including the Y PARs. Regardless of using an Ensembl or gencode transcriptome,  
555 female XX sample show Y-linked expression when using a default refence transcriptome index  
556 for pseudo-alignment, however the changes necessary for making a sex chromosome complement  
557 informed reference are different for the two builds.

558

## 559 **Discussion**

560 For accuracy, the sex chromosome complement of the sample should be taken into account when  
561 aligning RNA-Seq reads to reduce misaligning sequences. Neither Ensembl or Gencode human  
562 reference genomes are correct for aligning both XX and XY samples. The Ensembl GRCh38  
563 human reference genome includes all 22 autosomes, mtDNA, the X chromosome, the Y  
564 chromosome with the Y PARs masked, and contigs (Aken et al., 2017). The Gencode hg19 human  
565 reference genome includes everything with no sequences masked (Harrow et al., 2012).

566         Measurements of X chromosome expression increase for both male XY and female XX  
567 whole blood, brain cortex, breast, liver, and thyroid samples when aligned to a sex chromosome  
568 complement informed reference genome versus aligning to a default reference genome (Figure 4).  
569 While we see increases in measured expression for PAR1 and PAR2 genes in both males and  
570 females, we only observe a difference in measured XTR expression in females. This is because  
571 while the PARs are 100% identical between the X and Y and so one copy (here we mask the Y-  
572 linked copy) should be masked, the XTR is not hard-masked in the YPARs-masked reference  
573 genome. The XTR is not identical between the X and Y; it shares 98.78% homology between X  
574 and Y but no longer recombines between X and Y (Veerappa et al., 2013) (Figure 1A) and because  
575 of this divergence, is therefore not hard-masked when aligning male XY samples. Tukiainen et al.,  
576 (2016) and others have shown that PAR1 genes have a male bias in expression (Tukiainen et al.,  
577 2016). Our findings here support this regardless if the samples were aligned to a default or a sex  
578 chromosome complement reference genome (Additional file 11 & 12). Differential expression  
579 results changed when using a sex chromosome complement informed alignment compared to using  
580 a default alignment. When aligned to a default reference genome, due to sequence similarity, some  
581 reads from female XX samples aligned to the Y chromosome (Figure 2; Figure 5). However, when

582 aligned to a reference genome informed by the sex chromosome complement, female XX samples  
583 no longer showed Y-linked gene expression, and more Y-linked genes were called as being  
584 differentially expressed between the sexes (Figure 2; Figure 5; Additional file 12 & 15). This  
585 suggests that if using a default reference genome for aligning RNA-Seq reads, one would miss  
586 some Y-linked genes as differentially expressed between the sexes (Figure 5). Furthermore, these  
587 Y-linked genes serve in various important biological processes, thus altering the functional  
588 interpretation of the sex differences (Additional file 16 & 17). Only when samples were aligned to  
589 a sex chromosome complement reference genome did we observe more genes called as  
590 differentially expressed between the sexes (Additional file 14). An increase in genes called  
591 differentially expressed additionally alters the GO analysis results (Additional file 16 & 17). When  
592 samples were aligned to a default reference genome we sometimes missed GO pathways or  
593 misinterpreted which were the top pathways.

594 The choice of read aligner has long been known to give slightly differing results of  
595 differential expression due to the differences in the alignment algorithms (Conesa et al., 2016;  
596 Costa-Silva et al., 2017). Differences between HISAT and STAR could be contributed to  
597 differences in default parameters for handling multi-aligning reads (Kim et al., 2015). We show  
598 that regardless of choice of read aligner, HISAT or STAR, we observe similar results. Sample size  
599 has also long been known to alter differential expression analysis (Ching et al., 2014; Lamarre et  
600 al., 2018; Zhao et al., 2018). We therefore additionally replicated our findings in a smaller sample  
601 size of 3 male XY compared to 3 female XX samples for whole blood and brain cortex tissue and  
602 where the samples were randomly selected and confirmed the results from the larger sample size  
603 (Additional file 20).

604 In addition to reference-based quantification, we tested whether quantifying sex-linked  
605 reads with a pseudo-aligner would be affected by using a sex chromosome complement reference.  
606 Previous studies have shown that reference-based alignment is not necessary for high-quality  
607 estimation of transcript levels (Zielezinski et al., 2017). However, we observed expression  
608 estimates for Y-linked transcripts in female XX samples when using a default reference  
609 transcriptome index for pseudo-alignment quantification estimates. In contrast, when a sex  
610 chromosome complement informed reference transcriptome index was used, we observed no Y-  
611 linked expression in female XX samples. Salmon, and other alignment-free tools such as Kallisto  
612 (Bray et al., 2015) and Sailfish (R et al., 2014), build an index of k-mers from a reference  
613 transcriptome. The k-mer transcriptome index is used to group pseudoalignments belonging to the  
614 same set of transcripts to directly estimate the expression of each transcript. A k-mer alignment  
615 free approach is faster and less demanding than alignment protocols (Zielezinski et al., 2017);  
616 however, a sex chromosome complement informed transcriptome index should be carefully  
617 considered because even a k-mer approach is not sensitive to regions that are 100% identical in  
618 sequence. Additionally, alignment-free methods are not as robust in quantifying expression  
619 estimates for small RNAs and lowly-expressed genes (Wu et al., 2018).

620 The choice of reference transcriptome or reference genome can also give slightly differing  
621 results of differential expression due to the difference in which transcripts are included in the  
622 transcriptome (Zhao and Zhang, 2015). The Ensembl cDNA does not include the Y PAR linked  
623 transcripts whereas the gencode transcriptome fasta includes both the X and Y PARs. The Ensembl  
624 transcriptome does not include non-coding RNAs, such as *XIST* transcripts. The *XIST* gene is  
625 called as being up-regulated in the female XX samples for all tissues and all comparisons except  
626 for when transcript expression was estimated using the Ensembl reference transcriptome

627 (Additional file 15, 18, & 19). Given the current builds, for RNA-seq projects interested in sex  
628 chromosome linked transcript expression, we suggest that researchers use a gencode sex  
629 chromosome complement informed reference transcriptome index.

630 Ideally, one would use DNA to confirm presence or absence of the Y chromosome, but if  
631 DNA sequence was not generated, one would need to confirm the genetic sex of the sample by  
632 assessing expression estimates for X-linked and Y-linked genes. To more carefully investigate the  
633 ability to use gene expression to infer sex chromosome complement of the sample, we examined  
634 the gene expression for a select set of X-Y homologous genes, as well as *XIST* and *SRY* that are  
635 known to be differentially expressed between the sexes (Figure 2, Additional file 13). The samples  
636 broadly segregated by sex for Y-linked gene expression using default alignment. However, the  
637 pattern was messy for each individual Y-linked gene. Thus, if inferring sex from RNA-Seq data,  
638 we recommend using the estimated expression of multiple X-Y homologous genes and *XIST* to  
639 infer the genetic sex of the sample. Samples should be aligned to a default reference genome first  
640 to look at the expression for several Y-specific genes to determine if the sample is XY or XX.  
641 Then samples should be realigned to the appropriate sex chromosome complement informed  
642 reference genome. Independently assessing sex chromosome complement of samples becomes  
643 increasingly important as karyotypically XY individuals are known to have lost the Y chromosome  
644 in particular tissues sampled, as shown in Alzheimer Disease (Dumanski et al., 2016), age-related  
645 macular degeneration (Grassmann et al., 2019), and in the blood of aging individuals (Forsberg,  
646 2017), but should not have *XIST* expression. However, *XIST* may not be a sufficient marker alone  
647 to infer sex chromosome complement, especially in cancer in samples from XX individuals, where  
648 the inactive X can become reactivated (Chaligné et al., 2015). Self-reported sex may not match the  
649 sex chromosome complement of the samples, even in karyotypic individuals.

650

## 651 **Conclusion**

652 Here we show that aligning RNA-Seq reads to a sex chromosome complement informed reference  
653 genome will change the results of the analysis compared to aligning reads to a default reference  
654 genome. We previously observed that a sex chromosome complement informed alignment is  
655 important for DNA as well (Webster et al., 2019). A sex chromosome complement informed  
656 approach is needed for a sensitive and specific analysis of gene expression on the sex chromosomes  
657 (Khrantsova et al., 2018). A sex chromosome complement informed reference alignment resulted  
658 in increased expression of the PARs of the X chromosome for both male XY and female XX  
659 samples. We further found different genes called as differentially expressed between the sexes and  
660 identified sex differences in gene pathways that were missed when samples were aligned to a  
661 default reference genome.

## 662 **Perspectives and Significance**

663 The accurate alignment and pseudo-alignment of the short RNA-Seq reads to the reference genome  
664 or reference transcriptome is essential for drawing reliable conclusions from differential  
665 expression data analysis on the sex chromosomes. We strongly urge studies using RNA-Seq to  
666 carefully consider the genetic sex of the sample when quantifying reads, and provide a framework  
667 for doing so in the future ([https://github.com/SexChrLab/XY\\_RNAseq](https://github.com/SexChrLab/XY_RNAseq)).

668 **Funding**

669 This research was supported by startup funds from the School of Life Sciences and the Biodesign  
670 Institute at Arizona State University to MAW, School of Life Sciences Undergraduate Research  
671 (SOLUR) funding to SMB, IMSD funding to VAVV, ARCS Spetzler Scholar funding to KCO.  
672 This study was supported by the National Institute of General Medical Sciences of the National  
673 Institutes of Health under Award Number R35GM124827 to MAW. The content is solely the  
674 responsibility of the authors and does not necessarily represent the official views of the National  
675 Institutes of Health.

676

677 **Author contributions**

678 KCO: Supervision, Formal Analysis, Investigation, Visualization, Writing - Original Draft

679 Preparation, Writing - Review and Editing

680 SMB: Formal Analysis, Investigation, Writing - Original Draft Preparation, Writing - Review

681 and Editing

682 JPA: Formal Analysis, Investigation, Writing - Review and Editing

683 VAVV: Investigation, Writing - Review and Editing

684 MAW: Conceptualization, Supervision, Visualization, Resources, Project Administration,

685 Writing - Original Draft Preparation, Writing - Review and Editing, Funding Acquisition

686

687 **Acknowledgements**

688 We thank Heini Natri for comments on the manuscript.

689

690 **Competing Interests**



691 The authors declare no competing interests.

692

### 693 **Availability of Data and Material**

694 The RNA-Seq datasets analyzed during the current study are available from the GTEx project  
695 through dbGaP under accession phs000424.v6.p1; we received approval to access this data under  
696 dbGaP accession #8834. All codes used are available on GitHub:

697 [https://github.com/SexChrLab/XY\\_RNAseq](https://github.com/SexChrLab/XY_RNAseq).

698

### 699 **Ethics Approval and Consent to Participate**

700 Not applicable.

701

### 702 **Consent for Publication**

703 Not applicable.

704 **Figure Legends**

705

706 **Figure 1. Homology between the human X and Y chromosomes where misaligning could**

707 **occur. A)** High sequence homology exists between the human X and Y chromosomes in three

708 regions: 100% sequence identity for the pseudoautosomal regions (PARs), PAR1 and PAR2, and

709 ~99% sequence homology in the X-transposed region (XTR). The X chromosome PAR1 is ~2.78

710 million bases (Mb) extending from X:10,001 to 2,781,479 and the X chromosome PAR2 is ~0.33

711 Mb extending from X:155,701,383 to 156,030,895. The X chromosome PAR1 and PAR2 are

712 identical in sequence to the Y chromosome PAR1 Y:10,001 - 2,781,479 and PAR2 Y:56,887,903

713 - 57,217,415. **B)** Using a standard alignment approach will result in reads misaligning between

714 regions of high sequence homology on the sex chromosomes. **C)** Using a reference genome that

715 is informed by the genetic sex of the sample may help to reduce misaligning between the X and Y

716 chromosomes. In humans, samples without evidence of a Y chromosome should be aligned to a

717 Y-masked reference genome and samples with evidence of a Y should be aligned to a YPARs-

718 masked reference genome.

719

720 **Figure 2. Genetic sex of RNA-Seq samples.** We investigated gene expression,

721  $\log_2(\text{CPM}+0.25/L)$ , of XY homologous genes (*DDX3X/Y*, *PCDH11X/Y*, *USP9X/Y*, *ZFX/Y*,

722 *UTX/Y*), and *XIST*, and *SRY* in all samples from all tissues analyzed here from genetic males (blue

723 squares) and genetic females (orange circles) **A)** when aligned to a default reference genome, and

724 **B)** when aligned to a sex chromosome complement informed reference genome, using HISAT as

725 the read aligner.

726

727 **Figure 3. Multidimensional scaling for the top 100 most variable genes.** We investigated  
728 multidimensional scaling for the top 100 most common variable genes in brain cortex samples. **A)**  
729 Salmon pseudo-alignment with Ensembl transcriptome reference **B)** HISAT read aligner and **C)**  
730 STAR read aligner when quantifying using both the default and the sex chromosome complement  
731 informed reference. The most variation in the data is explained by the sex of the sample.

732

733 **Figure 4. X chromosome RNA-Seq alignment differences in brain cortex.** We plot  $\log_2$  fold  
734 change (FC) across **A)** the entire X chromosome and **B)** the first 5 million bases (Mb) and show  
735 **C)** average fold change in large genomic regions on the X chromosome between aligning brain  
736 cortex using HISAT to the default genome and aligning to a sex chromosome complement  
737 informed reference genome. For  $\log_2$  FC, a value less than zero indicates that the gene showed  
738 higher expression when aligned to a default reference genome, while values above zero indicate  
739 that the gene shows higher expression when aligned to a reference genome informed by the sex  
740 chromosome complement of the sample. Samples from genetic females are plotted in orange  
741 circles, while samples from males are plotted in blue squares. Darker shades indicate which gene  
742 points are in PAR1, XTR, and PAR2 while lighter shades are used for genes outside of those  
743 regions.

744

745 **Figure 5. Sex chromosome complement informed alignment calls more sex-linked genes as**  
746 **being differentially expressed.** **A)** Sex differences in gene expression,  $\log_2(\text{CPM}+0.25/L)$ ,  
747 between the twenty samples from genetic males and females are shown when aligning all samples  
748 to the default reference genome (left) and a reference genome informed on the sex chromosome  
749 complement (right) for brain cortex. Each point represents a gene. Genes that are differentially

750 expressed, adjusted p-value  $< 0.01$  are indicated in black for autosomal genes, blue for Y-linked  
751 genes, and red for X-linked genes. **B)** We show overlap between genes that are called as  
752 differentially expressed when all samples are aligned to the default genome, and genes that are  
753 called as differentially expressed when aligned to a sex chromosome complement informed  
754 genome. When samples were aligned to a reference genome informed on the sex chromosome  
755 complement, 27 genes were called as differentially expressed between the sexes, of which 4 were  
756 uniquely called in the sex chromosome complement informed alignment. There were no genes that  
757 were uniquely called as differentially expressed when aligned to a default reference genome.

758

#### 759 **Additional files**

760

761 **Additional file 1. Sample IDs.** RNA-Seq whole blood, brain cortex, breast, liver, and thyroid  
762 tissue samples from 20 genetic female (46, XX) and 20 genetic male (46, XY) individuals were  
763 downloaded from the Genotype-Tissue Expression (GTEx) project (GTEx Consortium, 2015) for  
764 a total of 200 RNA-Seq tissue samples.

765

766 **Additional file 2. Histogram of sample reported age.** For each tissue, whole blood, brain cortex,  
767 breast, liver, and thyroid, male XY and female XX samples were age matched perfectly between  
768 age 55 to 70. Females are shown in blue and males are shown in lime green. Since the samples  
769 were aged perfectly the histogram bars show only the overlap of female and male samples is a mix  
770 color of the blue and lime green.

771

772 **Additional file 3. Genetic sex of RNA-Seq samples when aligned using STAR.** Gene expression

773  $\log_2(\text{CPM}+0.25/L)$  for select XY homologous genes (*DDX3X/Y*, *PCDH11X/Y*, *USP9X/Y*, *ZFX/Y*,  
774 *UTX/Y*) and *XIST* and *SRY* when reads were aligned to a default reference genome **A**), and for **B**)  
775 when reads were aligned to a sex chromosome complement informed reference using STAR. Male  
776 XY whole blood, brain cortex, breast, liver, and thyroid samples are shown in blue squares and  
777 female XX in orange circles.

778

779 **Additional file 4. Genetic sex of RNA-Seq samples per tissue.** Gene expression  
780  $\log_2(\text{CPM}+0.25/L)$  for select XY homologous genes (*DDX3X/Y*, *PCDH11X/Y*, *USP9X/Y*, *ZFX/Y*,  
781 *UTX/Y*) and *XIST* and *SRY* when reads were aligned to a default reference genome **A**), and for **B**)  
782 when reads were aligned to a sex chromosome complement informed reference using HISAT and  
783 **C**) and **D**), for when the reads were aligned using STAR. Male XY whole blood, brain cortex,  
784 breast, liver, and thyroid samples are shown in blue squares and female XX in orange circles.

785

786 **Additional file 5. List of samples that were removed from downstream analysis.** Samples  
787 that did not cluster with the reported sex or clustered in unexpected ways were removed from the  
788 differential expression analysis. One male XY whole blood, 4 female XX and 4 male XY brain  
789 cortex, and one female XX breast sample were removed.

790

791 **Additional file 6. Multidimensional Scaling plots.** We investigated multidimensional scaling for  
792 all shared common variable genes for dimensions 1 and 2, and for dimensions 2 and 3 in each  
793 tissue. The most variation in each tissue is explained by the aligner **C.aligner**. The second most  
794 variation in each tissue is explained by the sex of the sample **A.sex**.

795

796 **Additional file 7. HISAT mapped reads bar plot.** Mean difference in expression for average  
797 total reads mapped for each tissue and each sex when aligned to a sex chromosome informed  
798 versus a default reference genome. Paired t-test to test for significant difference in total reads  
799 mapped for the whole transcriptome, chromosome 8, and chromosome X. Nonparametric Wilcoxon  
800 single rank sum test was used to test for significant difference in total reads mapped on the Y  
801 chromosome for male samples in each tissue separately. Red \* indicate a significant, p-value <  
802 0.05, difference in average mapped reads, NS is no significant differences.

803  
804 **Additional file 8. STAR mapped reads bar plot.** Mean difference in expression for average total  
805 reads mapped for each tissue and each sex when aligned to a sex chromosome informed versus a  
806 default reference genome. Paired t-test to test for significant difference in total reads mapped for  
807 the whole transcriptome, chromosome 8, and chromosome X. Nonparametric Wilcoxon single rank  
808 sum test was used to test for significant difference in total reads mapped on the Y chromosome for  
809 male samples in each tissue separately. Red \* indicate a significant, p-value < 0.05, difference in  
810 average mapped reads, NS is no significant differences.

811  
812 **Additional file 9. Paired t-test for mapped reads in default compared to sex chromosome**  
813 **complement reference genome.** Mean difference in expression for average total reads mapped  
814 for each tissue and each sex when aligned to a sex chromosome informed versus a default reference  
815 genome. Paired t-test to test for significant difference in total reads mapped for the whole  
816 transcriptome (WT), chromosome 8, and chromosome X. Nonparametric Wilcoxon single rank sum  
817 test was used to test for significant difference in total reads mapped on the Y chromosome for male  
818 samples in each tissue separately.

819

820 **Additional file 10. X chromosome expression differences between default and sex**  
821 **chromosome complement informed alignment.** X chromosome gene expression differences  
822 between default and sex chromosome complement informed alignment. Increase in expression  
823 when aligned to a sex chromosome complement informed reference genome is a  $\log_2$  fold change  
824 (FC)  $> 0$ . A decrease in expression when aligned to a sex chromosome complement informed  
825 reference genome is  $\log_2$  FC  $< 0$ . Female XX samples are indicated by red and pink circles for  
826 PAR1, XTR, PAR2 genes, and for all other X chromosome genes respectively. Blue and light blue  
827 squares represent male XY samples. Blue squares indicate which gene points are in PAR1, XTR,  
828 and PAR2, and light blue squares are for genes outside of those regions. Differences in X  
829 chromosome expression between reference genomes default and sex chromosome complement for  
830 male XY and female XX samples aligned using HISAT for the whole X chromosome and the first  
831 5Mb are shown for the whole blood (**A** and **B**, respectively), brain cortex (**E** and **F**, respectively),  
832 breast (**I** and **J**, respectively), liver (**M** and **N**, respectively), and thyroid (**Q** and **R**, respectively).  
833 Differences in X chromosome expression between reference genomes for male XY and female  
834 XX samples aligned using STAR for the whole X chromosome and the first 5Mb are shown for  
835 the whole blood (**C** and **D**, respectively), brain cortex (**G** and **H**, respectively), breast (**K** and **L**,  
836 respectively), liver (**O** and **P**, respectively), and thyroid (**S** and **T**, respectively).

837

838 **Additional file 11. X chromosome regions mean and median expression values.** X  
839 chromosome regions PAR1, PAR2, XTR, XDG, XAR, XCR mean and median CPM expression  
840 for male XY and female XX samples for each tissue separately when aligned to a default or sex  
841 chromosome complement informed reference genome using either HISAT and STAR. Paired t-

842 test was used to test for significant differences in expression. XTR and XAR show a significant  
843 increase, p-value < 0.05, in female expression for each tissue type. XTR and XAR additionally  
844 show a significant increase, p-value < 0.05, in male expression for liver and thyroid. PAR2 shows  
845 a significant increase, p-value < 0.05, in female liver expression. Additionally reported fold change  
846 in mean expression when using a sex chromosome complement informed compared to a default  
847 reference genome. The mean fold change in expression either increased or stayed the same ranging  
848 from 2.8 to 0.999 fold increase in expression. Finally, mean male over mean female expression  
849 was reported for each X chromosome region for each tissue. Mean male over mean female  
850 expression decreases for XTR when using a sex chromosome complement reference genome for  
851 each tissue.

852

853 **Additional file 12. Whole genome gene expression values per sample, aligner and reference**  
854 **genome used for alignment.** CPM values for male XY and female XX whole blood, brain cortex,  
855 breast, liver and thyroid samples when aligned to a default and sex chromosome complement  
856 informed reference genome for the whole genome (1-22, mtDNA, X, Y and non-chromosomal).

857

858 **Additional file 13. Gene expression for XY homologous genes.** X chromosome expression for  
859 26 X and Y homologous genes (*AMELX*, *ARSD*, *ARSE*, *ARSF*, *CASK*, *GYG2*, *HSFX1*, *HSFX2*,  
860 *NLGN4X*, *OFD1*, *PCDH11X*, *PRKX*, *RBMX*, *RPS4X*, *SOX3*, *STS*, *TBL1X*, *TGIF2LX*, *TMSB4X*,  
861 *TSPYL2*, *USP9X*, *VCX*, *VCX2*, *VCX3A*, *VCX3B*, *ZFX*). Difference in gene expression for when  
862 male XY and female XX samples were aligned to a default and sex chromosome complement  
863 informed reference genome for each tissue. Little to no difference in gene expression between  
864 default and sex chromosome complement informed reference genome alignment was observed for



865 25 of the 26 X and Y homologous genes for both male XY and female XX samples using either  
866 HISAT or STAR. The log<sub>2</sub> fold increase in expression for *PCDH11X* when aligned using HISAT  
867 was 0.4, 0.28, 0.33, 0.16, and 0.16 for whole blood, brain cortex, breast, liver, and thyroid,  
868 respectively. The greatest increase in expression was observed for *PCDH11X* in female whole  
869 blood at a log<sub>2</sub> fold increase of 0.4.

870

871 **Additional file 14. Differentially expressed genes between the sexes that were uniquely and**  
872 **jointly called between reference genomes.** Genes that are differentially expressed between the  
873 sexes, male XY and female XX, for whole blood, brain cortex, breast, liver, and thyroid samples.  
874 Differentially expressed genes that are uniquely called when using either the default or sex  
875 chromosome complement informed reference genome and differentially expressed genes that were  
876 jointly called between the reference genomes.

877

878 **Additional file 15. Gene expression differences between male XY and female XX samples.**  
879 Sex differences in gene expression for whole blood, brain cortex, breast, liver, and thyroid samples  
880 for when samples were aligned to a default reference genome and to a reference genome informed  
881 on the sex chromosome complement. Showing sex differences in gene expression between  
882 reference genomes used for alignment and for when samples were aligned using HISAT and  
883 STAR.

884

885 **Additional file 16. GO analysis of differentially expressed genes in female and male samples**  
886 **with HISAT aligner.** Gene enrichment analysis of genes that are more highly expressed in one  
887 sex versus the other sex for each tissue, whole blood, brain cortex, breast, liver and thyroid, when

888 samples were aligned to a default or sex chromosome complement informed reference genome  
889 using HISAT.

890

891 **Additional file 17. GO analysis of differentially expressed genes in female and male samples**  
892 **with STAR aligner.** Gene enrichment analysis of genes that are more highly expressed in one sex  
893 versus the other sex for each tissue, whole blood, brain cortex, breast, liver and thyroid, when  
894 samples were aligned to a default or sex chromosome complement informed reference genome  
895 using STAR.

896

897 **Additional file 18. Sex chromosome complement informed transcriptome reference**  
898 **eliminates Y-linked expression in female XX samples. A)** Sex differences in gene expression,  
899  $\log_2(\text{CPM}+0.25/L)$ , between the sixteen samples from genetic males and females are shown when  
900 aligning all samples to the default Ensembl reference transcriptome (left) and a reference  
901 transcriptome informed on the sex chromosome complement (right) for brain cortex. Each point  
902 represents a gene. Genes that are differentially expressed, adjusted p-value  $< 0.01$  are indicated in  
903 black for autosomal genes, blue for Y-linked genes, and red for X-linked genes. **B)** We show  
904 overlap between genes that are called as differentially expressed when all samples are pseudo-  
905 aligned to the default transcriptome, and genes that are called as differentially expressed when  
906 pseudo-aligned to a sex chromosome complement informed transcriptome reference. When  
907 samples were aligned to a reference transcriptome informed on the sex chromosome complement,  
908 14 genes were called as differentially expressed between the sexes. *PLCXDI* was uniquely called  
909 as differentially expressed when aligned to a default reference genome.

910

911  
912 **Additional file 18. Ensembl sex chromosome complement informed transcriptome reference**  
913 **eliminates Y-linked expression in female XX samples. A)** Sex differences in gene expression,  
914  $\log_2(\text{CPM}+0.25/L)$ , between the sixteen samples from genetic males and females are shown when  
915 aligning all samples to the default Ensembl reference transcriptome (left) and a reference  
916 transcriptome informed on the sex chromosome complement (right) for brain cortex. Each point  
917 represents a gene. Genes that are differentially expressed, adjusted p-value  $< 0.01$  are indicated in  
918 black for autosomal genes, blue for Y-linked genes, and red for X-linked genes. **B)** We show  
919 overlap between genes that are called as differentially expressed when all samples are pseudo-  
920 aligned to the default transcriptome, and genes that are called as differentially expressed when  
921 pseudo-aligned to a sex chromosome complement informed transcriptome reference. When  
922 samples were aligned to a reference transcriptome informed on the sex chromosome complement,  
923 14 genes were called as differentially expressed between the sexes. *PLCXDI* was uniquely called  
924 as differentially expressed when aligned to a default reference genome.

925  
926 **Additional file 19. Gencode sex chromosome complement informed transcriptome reference**  
927 **eliminates Y-linked expression in female XX samples. A)** Sex differences in gene expression,  
928  $\log_2(\text{CPM}+0.25/L)$ , between the sixteen samples from genetic males and females are shown when  
929 aligning all samples to the default gencode reference transcriptome (left) and a reference  
930 transcriptome informed on the sex chromosome complement (right) for brain cortex. Each point  
931 represents a gene. Genes that are differentially expressed, adjusted p-value  $< 0.01$  are indicated in  
932 black for autosomal genes, blue for Y-linked genes, and red for X-linked genes. **B)** We show  
933 overlap between genes that are called as differentially expressed when all samples are pseudo-

934 aligned to the default transcriptome, and genes that are called as differentially expressed when  
935 pseudo-aligned to a sex chromosome complement informed transcriptome reference. When  
936 samples were aligned to a reference transcriptome informed on the sex chromosome complement,  
937 17 genes were called as differentially expressed between the sexes. *ZBED1* was uniquely called as  
938 differentially expressed when aligned to a default reference genome.

939

940 **Additional file 20. 3 male XY and 3 female XX brain cortex and whole blood differential**  
941 **expression analysis.** Replicated analysis in a smaller sample size of 3 male XY compared to 3  
942 female XX samples for whole blood and brain cortex tissue. Samples were randomly selected,  
943 and confirm the results from the larger sample size.

944 **References**

- 945 Aken, B.L., Achuthan, P., Akanni, W., Amode, M.R., Bernsdorff, F., Bhai, J., Billis, K.,  
946 Carvalho-Silva, D., Cummins, C., Clapham, P., et al. (2017). Ensembl 2017. *Nucleic Acids Res.*  
947 *45*, D635–D642.
- 948 Albrecht, K.H., Young, M., Washburn, L.L., and Eicher, E.M. (2003). Sry expression level and  
949 protein isoform differences play a role in abnormal testis development in C57BL/6J mice  
950 carrying certain Sry alleles. *Genetics* *164*, 277–288.
- 951 Andrews, S. Babraham Bioinformatics - FastQC A Quality Control tool for High Throughput  
952 Sequence Data.
- 953 Arnold, A.P., and Chen, X. (2009). What does the “four core genotypes” mouse model tell us  
954 about sex differences in the brain and other tissues? *Front. Neuroendocrinol.* *30*, 1–9.
- 955 Arnold, A.P., Chen, X., and Itoh, Y. (2012). What a difference an X or Y makes: sex  
956 chromosomes, gene dose, and epigenetics in sexual differentiation. *Handb. Exp. Pharmacol.* *67–*  
957 *88*.
- 958 Barnett, D.W., Garrison, E.K., Quinlan, A.R., Strömberg, M.P., and Marth, G.T. (2011).  
959 BamTools: a C++ API and toolkit for analyzing and managing BAM files. *Bioinformatics* *27*,  
960 1691–1692.
- 961 Bolger, A.M., Lohse, M., and Usadel, B. (2014). Trimmomatic: a flexible trimmer for Illumina  
962 sequence data. *Bioinformatics* *30*, 2114–2120.

- 963 Bray, N., Pimentel, H., Melsted, P., and Pachter, L. (2015). Near-optimal RNA-Seq  
964 quantification. *ArXiv150502710 Cs Q-Bio*.
- 965 Cancer Genome Atlas Research Network, Weinstein, J.N., Collisson, E.A., Mills, G.B., Shaw,  
966 K.R.M., Ozenberger, B.A., Ellrott, K., Shmulevich, I., Sander, C., and Stuart, J.M. (2013). The  
967 Cancer Genome Atlas Pan-Cancer analysis project. *Nat. Genet.* *45*, 1113–1120.
- 968 Carrel, L., and Willard, H.F. (2005). X-inactivation profile reveals extensive variability in X-  
969 linked gene expression in females. *Nature* *434*, 400–404.
- 970 Chaligné, R., Popova, T., Mendoza-Parra, M.-A., Saleem, M.-A.M., Gentien, D., Ban, K., Piolot,  
971 T., Leroy, O., Mariani, O., Gronemeyer, H., et al. (2015). The inactive X chromosome is  
972 epigenetically unstable and transcriptionally labile in breast cancer. *Genome Res.* *25*, 488–503.
- 973 Charchar, F.J., Svartman, M., El-Mogharbel, N., Ventura, M., Kirby, P., Matarazzo, M.R.,  
974 Ciccodicola, A., Rocchi, M., D’Esposito, M., and Graves, J.A.M. (2003). Complex Events in the  
975 Evolution of the Human Pseudoautosomal Region 2 (PAR2). *Genome Res.* *13*, 281–286.
- 976 Charlesworth, B. (1991). The evolution of sex chromosomes. *Science* *251*, 1030–1033.
- 977 Ching, T., Huang, S., and Garmire, L.X. (2014). Power analysis and sample size estimation for  
978 RNA-Seq differential expression. *RNA N. Y. N* *20*, 1684–1696.
- 979 Conesa, A., Madrigal, P., Tarazona, S., Gomez-Cabrero, D., Cervera, A., McPherson, A.,  
980 Szczesniak, M.W., Gaffney, D.J., Elo, L.L., Zhang, X., et al. (2016). A survey of best practices  
981 for RNA-seq data analysis. *Genome Biol.* *17*, 13.

- 982 Consortium, T.Gte. (2015). The Genotype-Tissue Expression (GTEx) pilot analysis: Multitissue  
983 gene regulation in humans. *Science* 348, 648–660.
- 984 Costa-Silva, J., Domingues, D., and Lopes, F.M. (2017). RNA-Seq differential expression  
985 analysis: An extended review and a software tool. *PloS One* 12, e0190152.
- 986 Dobin, A., Davis, C.A., Schlesinger, F., Drenkow, J., Zaleski, C., Jha, S., Batut, P., Chaisson,  
987 M., and Gingeras, T.R. (2013). STAR: ultrafast universal RNA-seq aligner. *Bioinforma. Oxf.*  
988 *Engl.* 29, 15–21.
- 989 Dumanski, J.P., Lambert, J.-C., Rasi, C., Giedraitis, V., Davies, H., Grenier-Boley, B., Lindgren,  
990 C.M., Campion, D., Dufouil, C., European Alzheimer’s Disease Initiative Investigators, et al.  
991 (2016). Mosaic Loss of Chromosome Y in Blood Is Associated with Alzheimer Disease. *Am. J.*  
992 *Hum. Genet.* 98, 1208–1219.
- 993 Eden, E., Navon, R., Steinfeld, I., Lipson, D., and Yakhini, Z. (2009). GOrilla: a tool for  
994 discovery and visualization of enriched GO terms in ranked gene lists. *BMC Bioinformatics* 10,  
995 48.
- 996 Eyraas, E., Caccamo, M., Curwen, V., and Clamp, M. (2004). ESTGenes: Alternative Splicing  
997 From ESTs in Ensembl. *Genome Res.* 14, 976–987.
- 998 Forsberg, L.A. (2017). Loss of chromosome Y (LOY) in blood cells is associated with increased  
999 risk for disease and mortality in aging men. *Hum. Genet.* 136, 657–663.
- 1000 Gershoni, M., and Pietrokovski, S. (2017). The landscape of sex-differential transcriptome and  
1001 its consequent selection in human adults. *BMC Biol.* 15, 7.

- 1002 Goldstein, J.M., Holsen, L., Handa, R., and Tobet, S. (2014). Fetal hormonal programming of  
1003 sex differences in depression: linking women’s mental health with sex differences in the brain  
1004 across the lifespan. *Front. Neurosci.* 8.
- 1005 Grassmann, F., Kiel, C., den Hollander, A.I., Weeks, D.E., Lotery, A., Cipriani, V., Weber,  
1006 B.H.F., and International Age-related Macular Degeneration Genomics Consortium (IAMDGC)  
1007 (2019). Y chromosome mosaicism is associated with age-related macular degeneration. *Eur. J.*  
1008 *Hum. Genet. EJHG* 27, 36–41.
- 1009 GTEx Consortium (2015). Human genomics. The Genotype-Tissue Expression (GTEx) pilot  
1010 analysis: multitissue gene regulation in humans. *Science* 348, 648–660.
- 1011 Harrow, J., Frankish, A., Gonzalez, J.M., Tapanari, E., Diekhans, M., Kokocinski, F., Aken,  
1012 B.L., Barrell, D., Zadissa, A., Searle, S., et al. (2012). GENCODE: the reference human genome  
1013 annotation for The ENCODE Project. *Genome Res.* 22, 1760–1774.
- 1014 J, H., A, F., Jm, G., E, T., M, D., F, K., Bl, A., D, B., A, Z., S, S., et al. (2012). GENCODE: the  
1015 reference human genome annotation for The ENCODE Project. *Genome Res.* 22, 1760–1774.
- 1016 Khramtsova, E., Davis, L., and Stranger, B. (2018). The role of sex in the genomics of human  
1017 complex traits. *Nat. Rev. Genet.* 20.
- 1018 Kim, D., Langmead, B., and Salzberg, S.L. (2015). HISAT: a fast spliced aligner with low  
1019 memory requirements. *Nat. Methods* 12, 357–360.
- 1020 Lahn, B.T., and Page, D.C. (1999). Four evolutionary strata on the human X chromosome.  
1021 *Science* 286, 964–967.



- 1022 Lamarre, S., Frasse, P., Zouine, M., Labourdette, D., Sainderichin, E., Hu, G., Le Berre-Anton,  
1023 V., Bouzayen, M., and Maza, E. (2018). Optimization of an RNA-Seq Differential Gene  
1024 Expression Analysis Depending on Biological Replicate Number and Library Size. *Front. Plant*  
1025 *Sci.* *9*, 108.
- 1026 Lappalainen, T., Sammeth, M., Friedländer, M.R., 't Hoen, P.A.C., Monlong, J., Rivas, M.A.,  
1027 González-Porta, M., Kurbatova, N., Griebel, T., Ferreira, P.G., et al. (2013). Transcriptome and  
1028 genome sequencing uncovers functional variation in humans. *Nature* *501*, 506–511.
- 1029 Law, C.W., Chen, Y., Shi, W., and Smyth, G.K. (2014). voom: precision weights unlock linear  
1030 model analysis tools for RNA-seq read counts. *Genome Biol.* *15*, R29.
- 1031 Leinonen, R., Sugawara, H., and Shumway, M. (2011). The Sequence Read Archive. *Nucleic*  
1032 *Acids Res.* *39*, D19–D21.
- 1033 Li, H. (2018). Minimap2: pairwise alignment for nucleotide sequences. *Bioinformatics* *34*, 3094–  
1034 3100.
- 1035 Li, H., Handsaker, B., Wysoker, A., Fennell, T., Ruan, J., Homer, N., Marth, G., Abecasis, G.,  
1036 Durbin, R., and 1000 Genome Project Data Processing Subgroup (2009). The Sequence  
1037 Alignment/Map format and SAMtools. *Bioinforma. Oxf. Engl.* *25*, 2078–2079.
- 1038 Liao, Y., Smyth, G.K., and Shi, W. (2014). featureCounts: an efficient general purpose program  
1039 for assigning sequence reads to genomic features. *Bioinforma. Oxf. Engl.* *30*, 923–930.

- 1040 Mallick, S., Li, H., Lipson, M., Mathieson, I., Gymrek, M., Racimo, F., Zhao, M., Chennagiri,  
1041 N., Nordenfelt, S., Tandon, A., et al. (2016). The Simons Genome Diversity Project: 300  
1042 genomes from 142 diverse populations. *Nature* 538, 201–206.
- 1043 Natri, H.M., Wilson, M.A., and Buetow, K.H. (2019). Distinct molecular etiologies of male and  
1044 female hepatocellular carcinoma. *BMC Cancer* 19, 951.
- 1045 Naugler, W.E., Sakurai, T., Kim, S., Maeda, S., Kim, K., Elsharkawy, A.M., and Karin, M.  
1046 (2007). Gender disparity in liver cancer due to sex differences in MyD88-dependent IL-6  
1047 production. *Science* 317, 121–124.
- 1048 Pandey, R.S., Wilson Sayres, M.A., and Azad, R.K. (2013). Detecting evolutionary strata on the  
1049 human x chromosome in the absence of gametologous y-linked sequences. *Genome Biol. Evol.*  
1050 5, 1863–1871.
- 1051 Patro, R., Duggal, G., Love, M.I., Irizarry, R.A., and Kingsford, C. (2017). Salmon provides fast  
1052 and bias-aware quantification of transcript expression. *Nat. Methods* 14, 417–419.
- 1053 Piskol, R., Ramaswami, G., and Li, J.B. (2013). Reliable identification of genomic variants from  
1054 RNA-seq data. *Am. J. Hum. Genet.* 93, 641–651.
- 1055 R, P., Sm, M., and C, K. (2014). Sailfish Enables Alignment-Free Isoform Quantification From  
1056 RNA-seq Reads Using Lightweight Algorithms (*Nat Biotechnol*).
- 1057 Rahbari, R., Zhang, L., and Kebebew, E. (2010). Thyroid cancer gender disparity. *Future Oncol.*  
1058 Lond. Engl. 6, 1771–1779.

- 1059 Raznahan, A., Parikshak, N.N., Chandran, V., Blumenthal, J.D., Clasen, L.S., Alexander-Bloch,  
1060 A.F., Zinn, A.R., Wangsa, D., Wise, J., Murphy, D.G.M., et al. (2018). Sex-chromosome dosage  
1061 effects on gene expression in humans. *Proc. Natl. Acad. Sci. U. S. A.* *115*, 7398–7403.
- 1062 Robinson, M.D., McCarthy, D.J., and Smyth, G.K. (2010). edgeR: a Bioconductor package for  
1063 differential expression analysis of digital gene expression data. *Bioinforma. Oxf. Engl.* *26*, 139–  
1064 140.
- 1065 Ross, M.T., Grafham, D.V., Coffey, A.J., Scherer, S., McLay, K., Muzny, D., Platzer, M.,  
1066 Howell, G.R., Burrows, C., Bird, C.P., et al. (2005). The DNA sequence of the human X  
1067 chromosome. *Nature* *434*, 325–337.
- 1068 Seyednasrollah, F., Laiho, A., and Elo, L.L. (2015). Comparison of software packages for  
1069 detecting differential expression in RNA-seq studies. *Brief. Bioinform.* *16*, 59–70.
- 1070 Shi, L., Zhang, Z., and Su, B. (2016). Sex Biased Gene Expression Profiling of Human Brains at  
1071 Major Developmental Stages. *Sci. Rep.* *6*, 21181.
- 1072 Skaletsky, H., Kuroda-Kawaguchi, T., Minx, P.J., Cordum, H.S., Hillier, L., Brown, L.G.,  
1073 Repping, S., Pyntikova, T., Ali, J., Bieri, T., et al. (2003). The male-specific region of the human  
1074 Y chromosome is a mosaic of discrete sequence classes. *Nature* *423*, 825–837.
- 1075 Sonesson, C., Love, M.I., and Robinson, M.D. (2015). Differential analyses for RNA-seq:  
1076 transcript-level estimates improve gene-level inferences. *F1000Research* *4*, 1521.

- 1077 Traglia, M., Bseiso, D., Gusev, A., Adviento, B., Park, D.S., Mefford, J.A., Zaitlen, N., and  
1078 Weiss, L.A. (2017). Genetic Mechanisms Leading to Sex Differences Across Common Diseases  
1079 and Anthropometric Traits. *Genetics* 205, 979–992.
- 1080 Tukiainen, T., Villani, A.-C., Yen, A., Rivas, M.A., Marshall, J.L., Satija, R., Aguirre, M.,  
1081 Gauthier, L., Fleharty, M., Kirby, A., et al. (2016). Landscape of X chromosome inactivation  
1082 across human tissues. *BioRxiv* 073957.
- 1083 Turner, M.E., Ely, D., Prokop, J., and Milsted, A. (2011). Sry, more than testis determination?  
1084 *Am. J. Physiol.-Regul. Integr. Comp. Physiol.* 301, R561–R571.
- 1085 Veerappa, A.M., Padakannaya, P., and Ramachandra, N.B. (2013). Copy number variation-based  
1086 polymorphism in a new pseudoautosomal region 3 (PAR3) of a human X-chromosome-  
1087 transposed region (XTR) in the Y chromosome. *Funct. Integr. Genomics* 13, 285–293.
- 1088 Webster, T.H., Couse, M., Grande, B.M., Karlins, E., Phung, T.N., Richmond, P.A., Whitford,  
1089 W., and Wilson, M.A. (2019). Identifying, understanding, and correcting technical artifacts on  
1090 the sex chromosomes in next-generation sequencing data. *GigaScience* 8.
- 1091 Wu, D.C., Yao, J., Ho, K.S., Lambowitz, A.M., and Wilke, C.O. (2018). Limitations of  
1092 alignment-free tools in total RNA-seq quantification. *BMC Genomics* 19, 510.
- 1093 Zhao, S., and Zhang, B. (2015). A comprehensive evaluation of ensembl, RefSeq, and UCSC  
1094 annotations in the context of RNA-seq read mapping and gene quantification. *BMC Genomics*  
1095 16, 97.

1096 Zhao, S., Li, C.-I., Guo, Y., Sheng, Q., and Shyr, Y. (2018). RnaSeqSampleSize: real data based  
1097 sample size estimation for RNA sequencing. *BMC Bioinformatics* *19*, 191.

1098 Zieleszinski, A., Vinga, S., Almeida, J., and Karlowski, W.M. (2017). Alignment-free sequence  
1099 comparison: benefits, applications, and tools. *Genome Biol.* *18*, 186.

1100 (2020). broadinstitute/picard (Broad Institute).

1101

**A** X and Y sequence homology

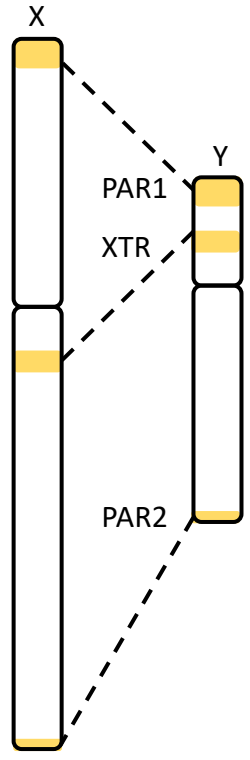

**B** RNA-seq alignment to a default reference genome

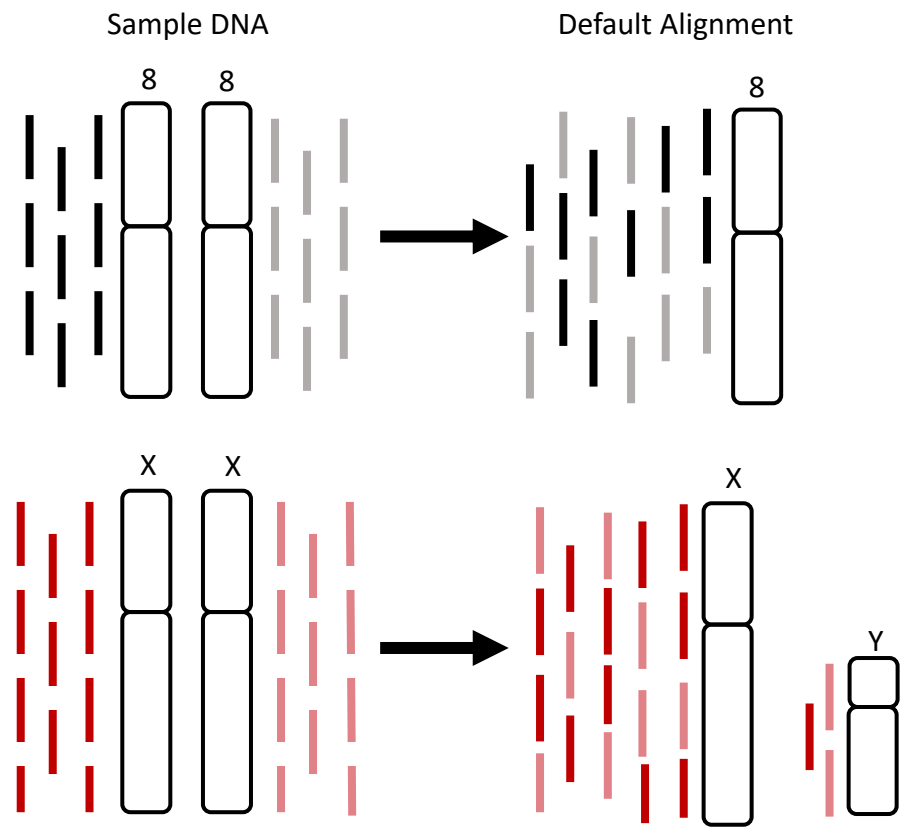

**C** Sex chromosome complement informed alignment

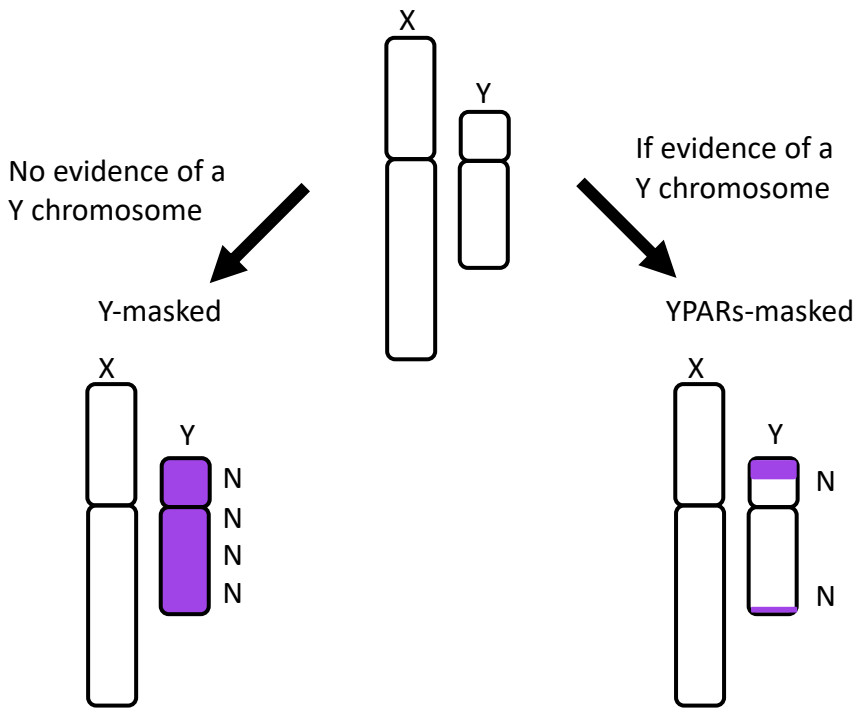

**A** All TISSUES aligned to HISAT and default reference genome

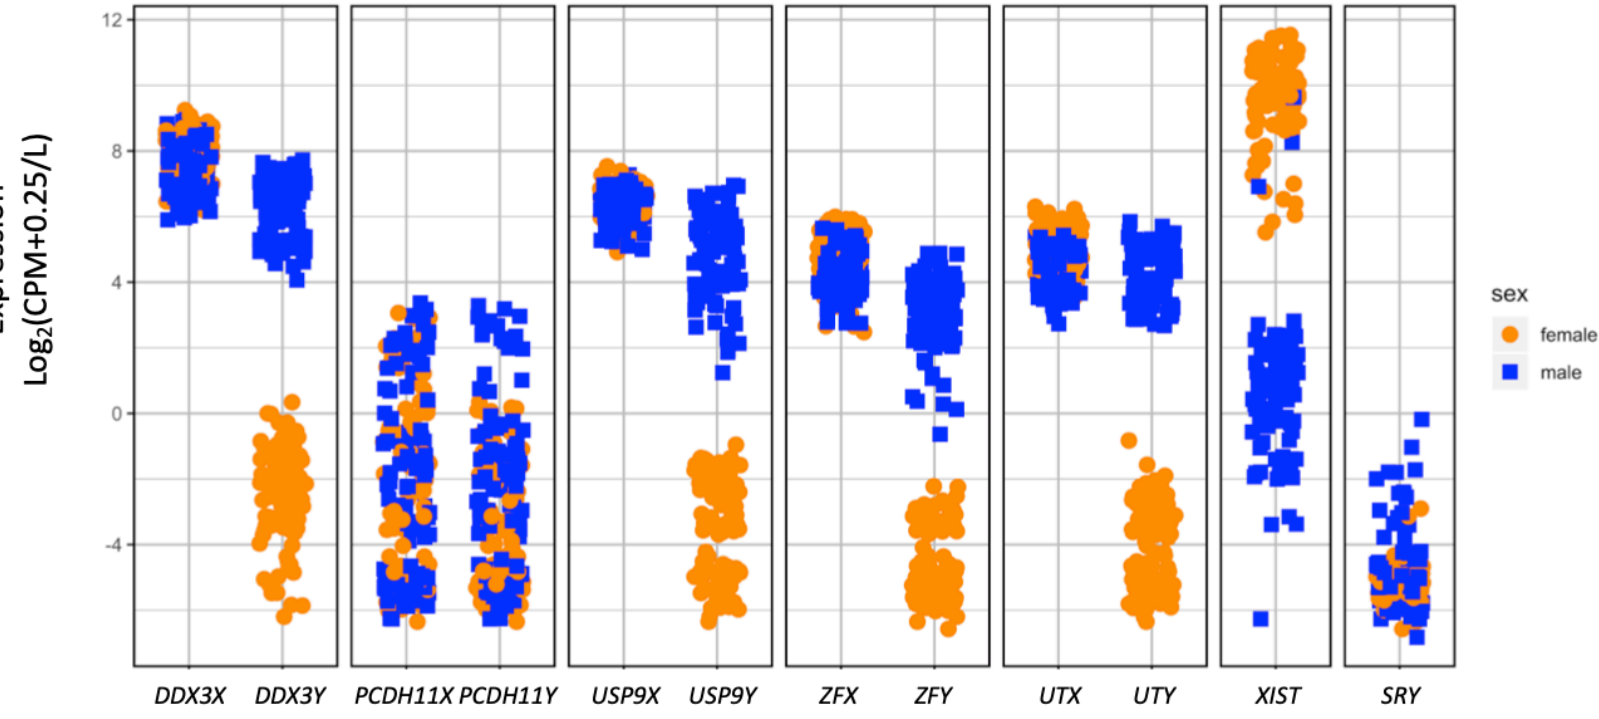

**B** All TISSUES aligned to HISAT and sex chromosome complement reference genome

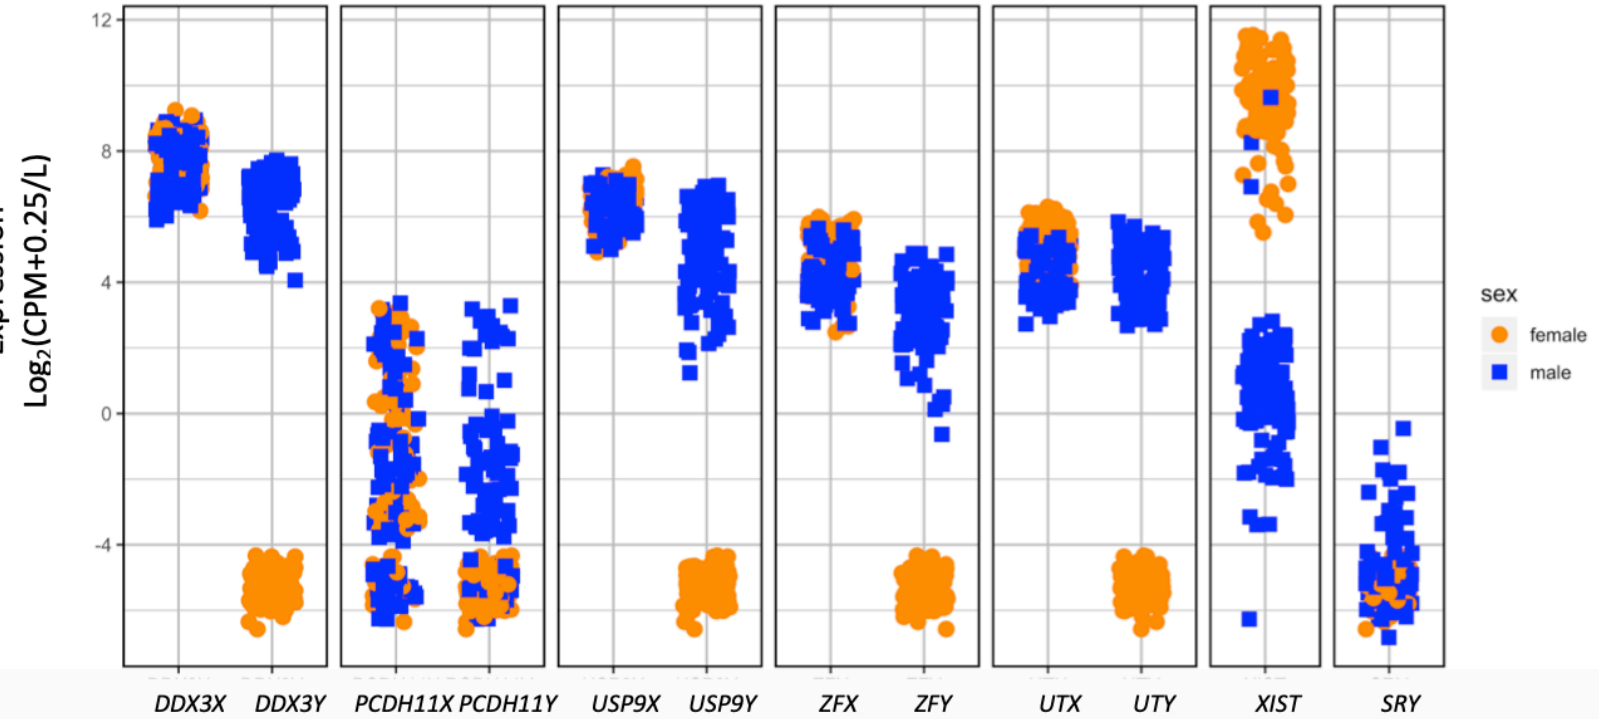

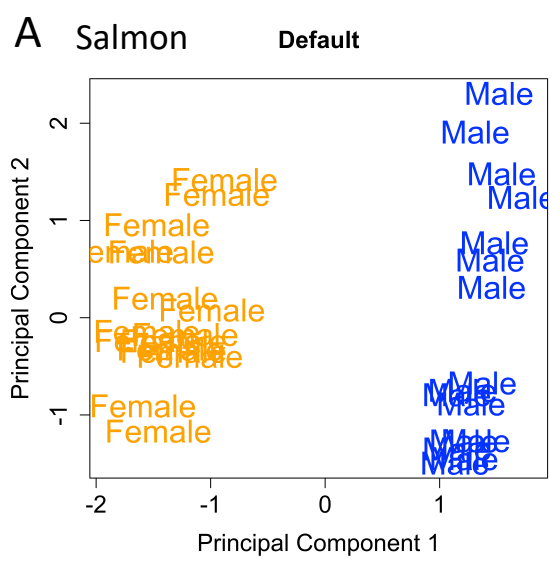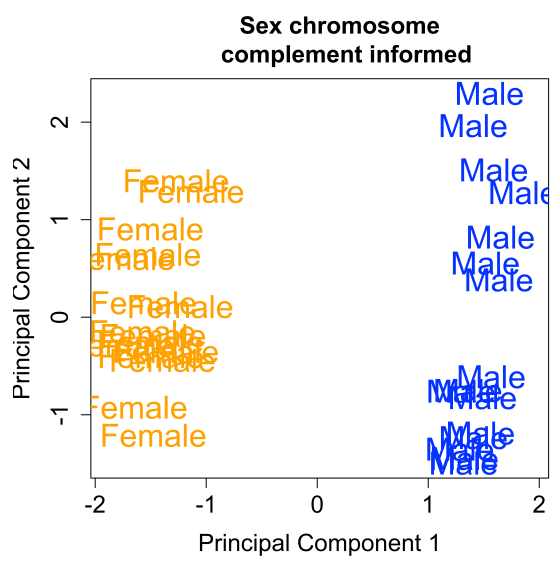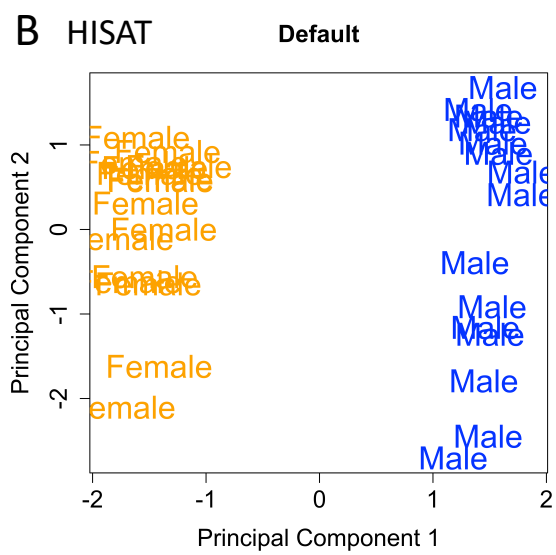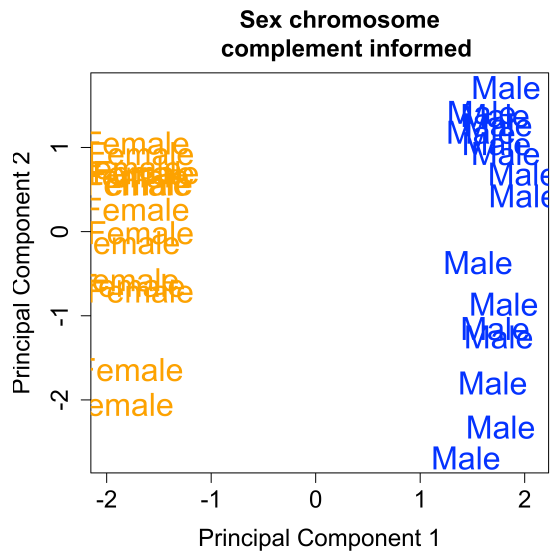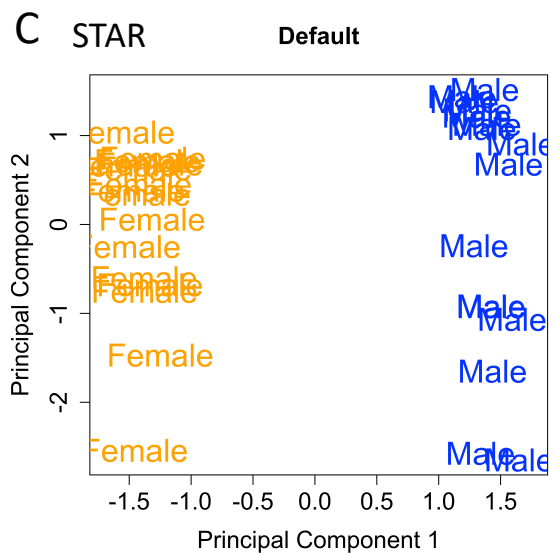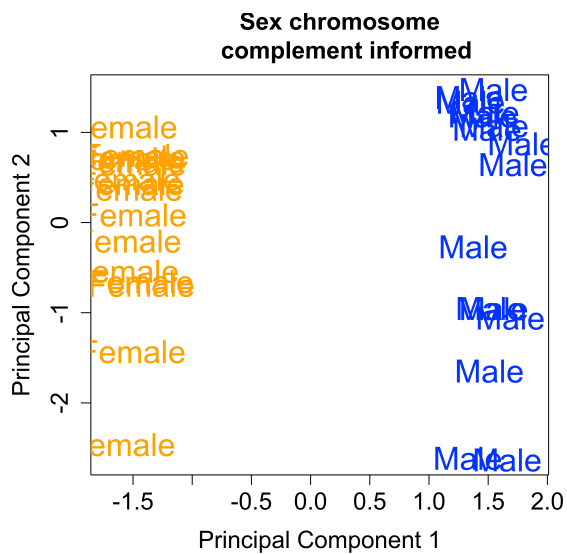



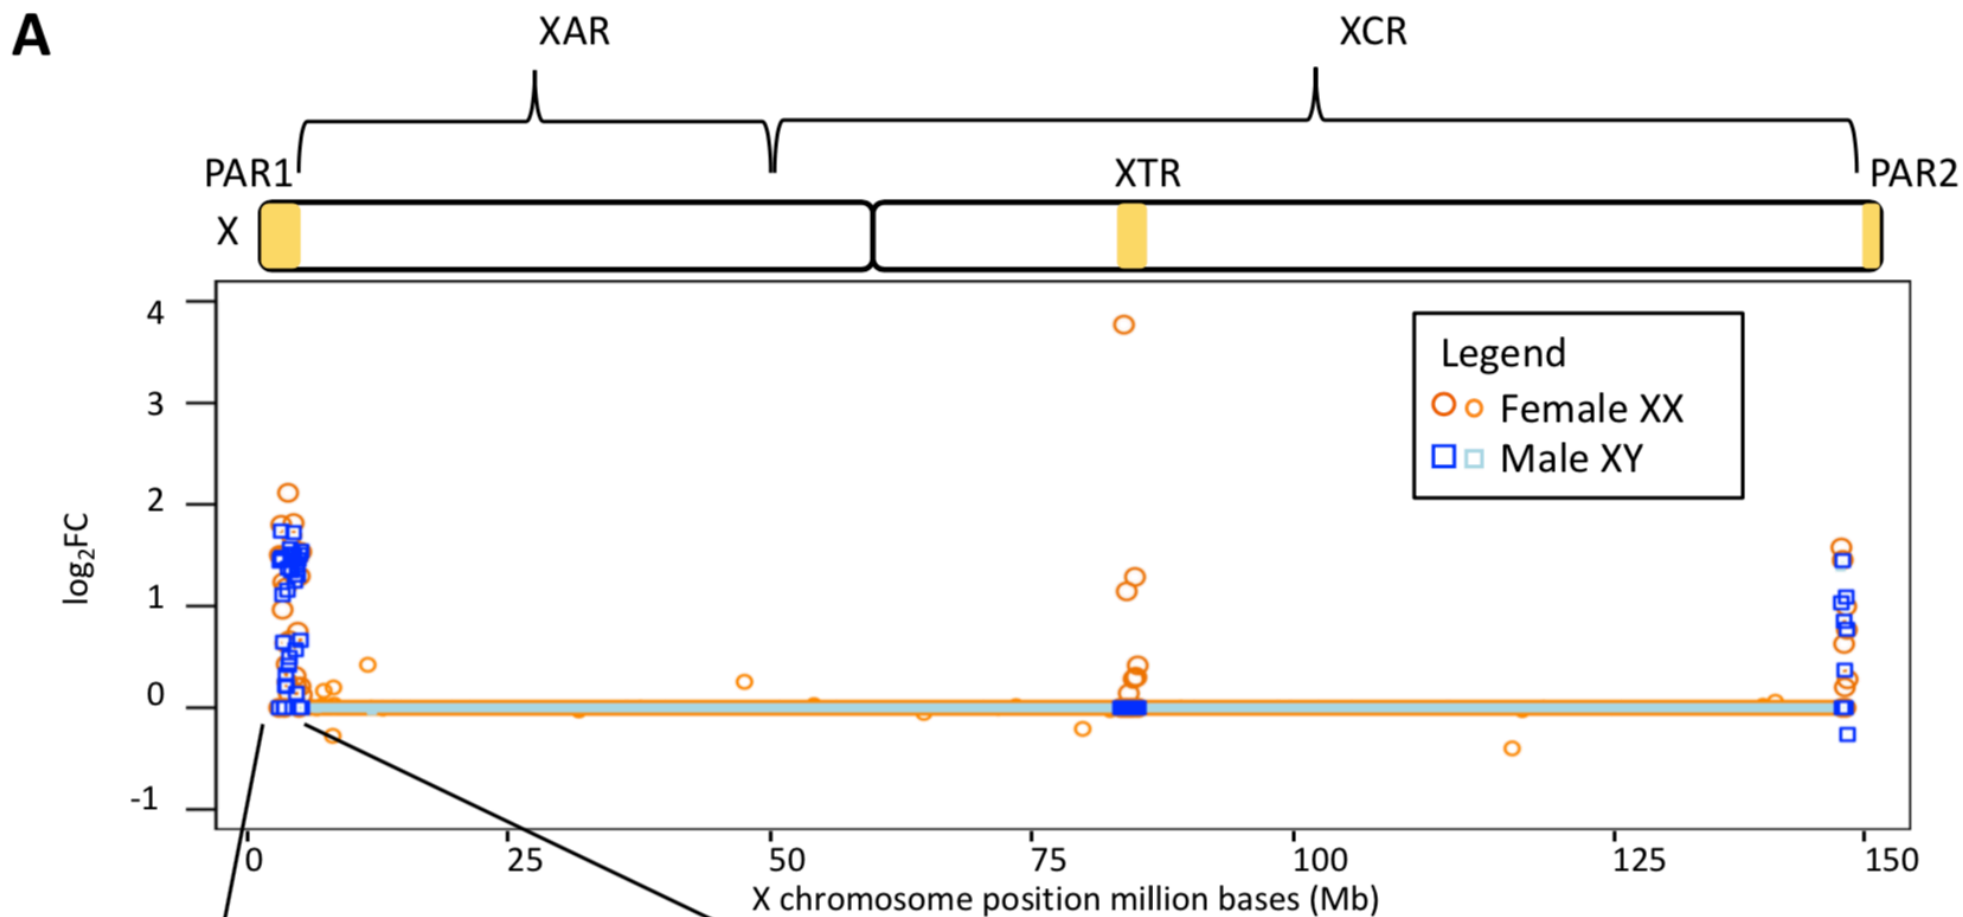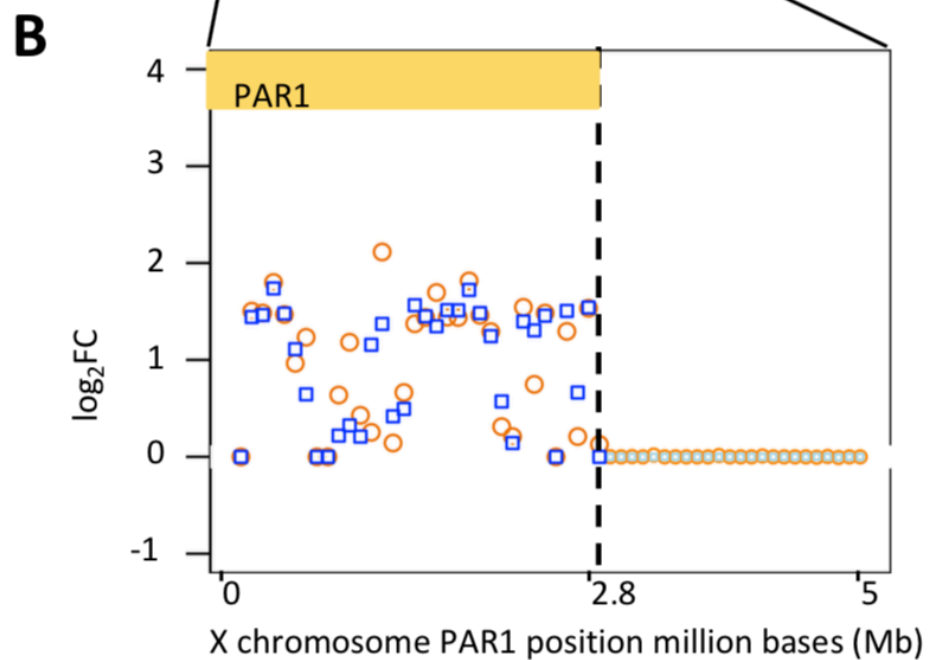

**C** Fold change in mean expression for X chromosome regions

| X chromosome regions | Female 46, XX | Male 46, XY |
|----------------------|---------------|-------------|
| PAR1                 | 2.73          | 2.75        |
| XCR                  | 1.00          | 1.00        |
| XAR                  | 1.00          | 1.00        |
| XTR                  | 1.22          | 1.00        |
| XDG                  | 1.00          | 1.00        |
| PAR2                 | 2.13          | 2.19        |

**A****Default alignment**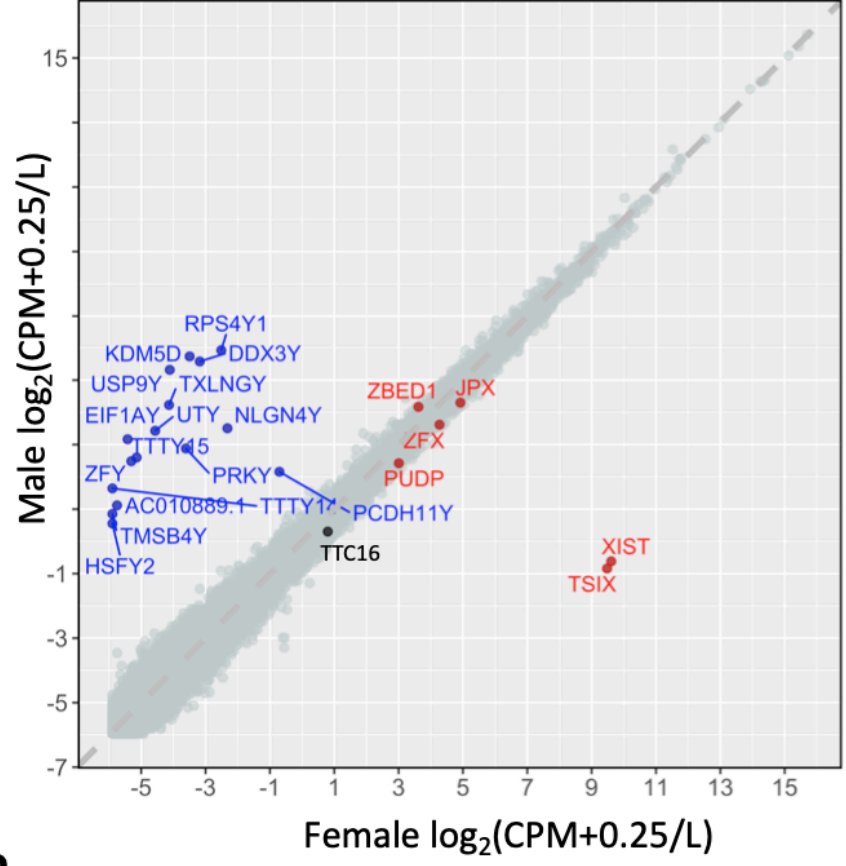**Sex chromosome complement informed alignment**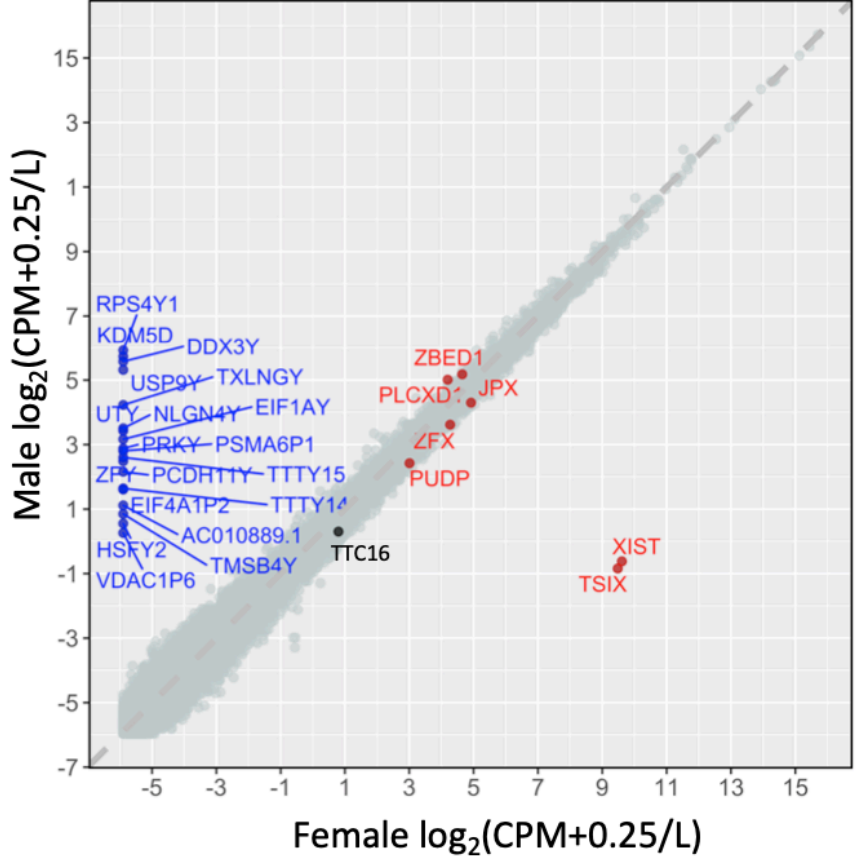

Legend  
 FDR < 0.01  
 autosomal  
 X-linked  
 Y-linked

**B**

| Genes     | Total | Unique |
|-----------|-------|--------|
| Autosomal | 1     | 0      |
| X-linked  | 6     | 0      |
| Y-linked  | 16    | 0      |

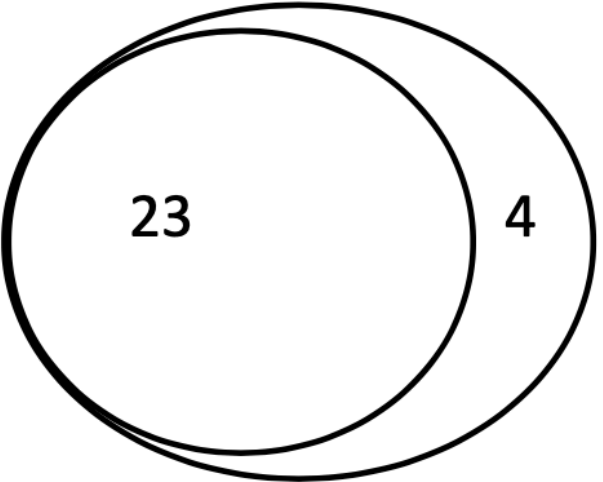

| Genes     | Total | Unique |
|-----------|-------|--------|
| Autosomal | 1     | 0      |
| X-linked  | 7     | 1      |
| Y-linked  | 19    | 3      |
